# Supplementary material for: Energy depletion and opportunistic microbial colonisation in white syndrome lesions from corals across the Indo-Pacific
Source: PubMed Central journal article supplement (PMC7672225; doi:10.1038/s41598-020-76792-x), 2020-11-17
Supplement: 41598_2020_76792_MOESM1_ESM.pdf [file 41598_2020_76792_MOESM1_ESM.pdf]

**ENERGY DEPLETION AND OPPORTUNISTIC MICROBIAL COLONISATION IN  
WHITE SYNDROME LESIONS FROM CORALS ACROSS THE INDO-PACIFIC**

Hillary A. Smith, Jessica A. Conlan, F. Joseph Pollock, Naohisa Wada, Amanda Shore, Julia  
Yun-Hsuan Hung, Greta S. Aeby, Bette L. Willis, David S. Francis, David G. Bourne

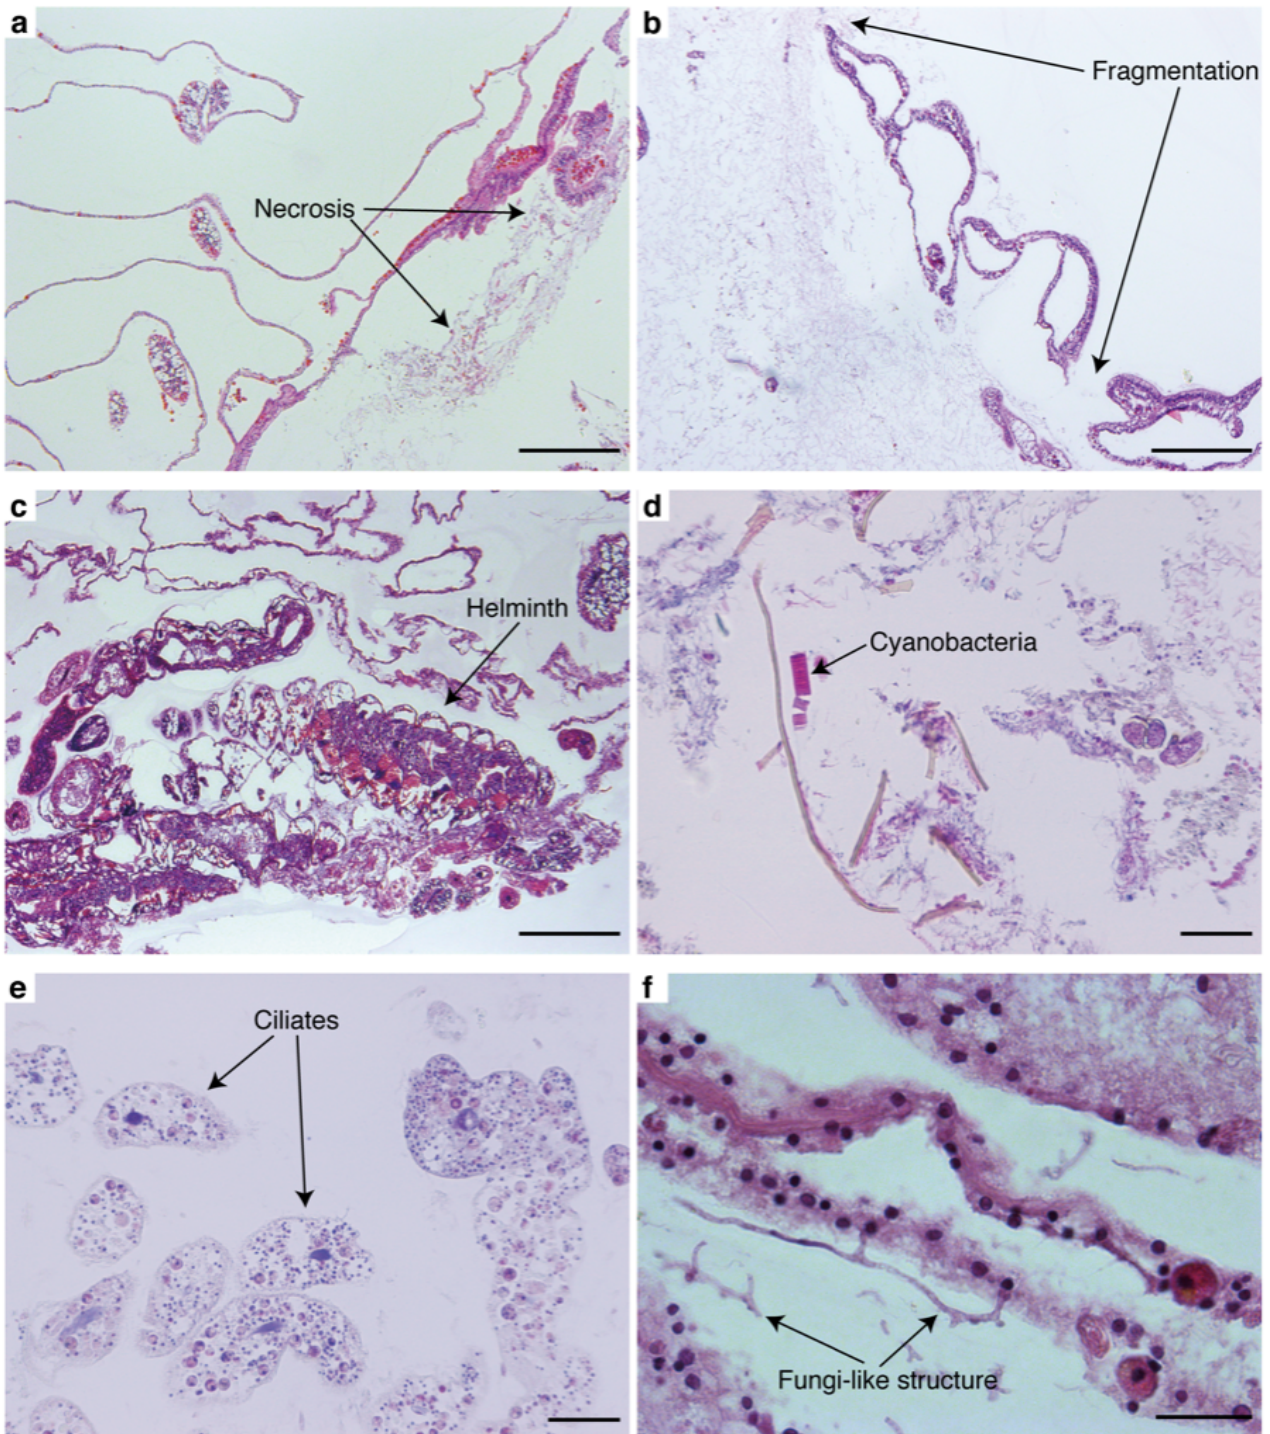

Supplementary Figure S1. Histological images of a) tissue necrosis (scale bar = 200  $\mu\text{m}$ ); b) fragmentation (scale bar = 200  $\mu\text{m}$ ); c) helminths (scale bar = 200  $\mu\text{m}$ ); d) cyanobacteria (scale bar = 50  $\mu\text{m}$ ); e) ciliates (scale bar = 50  $\mu\text{m}$ ); and f) fungi-like structures (scale bar = 20  $\mu\text{m}$ ) detected in colonies of WS-diseased *Acropora hyacinthus*.

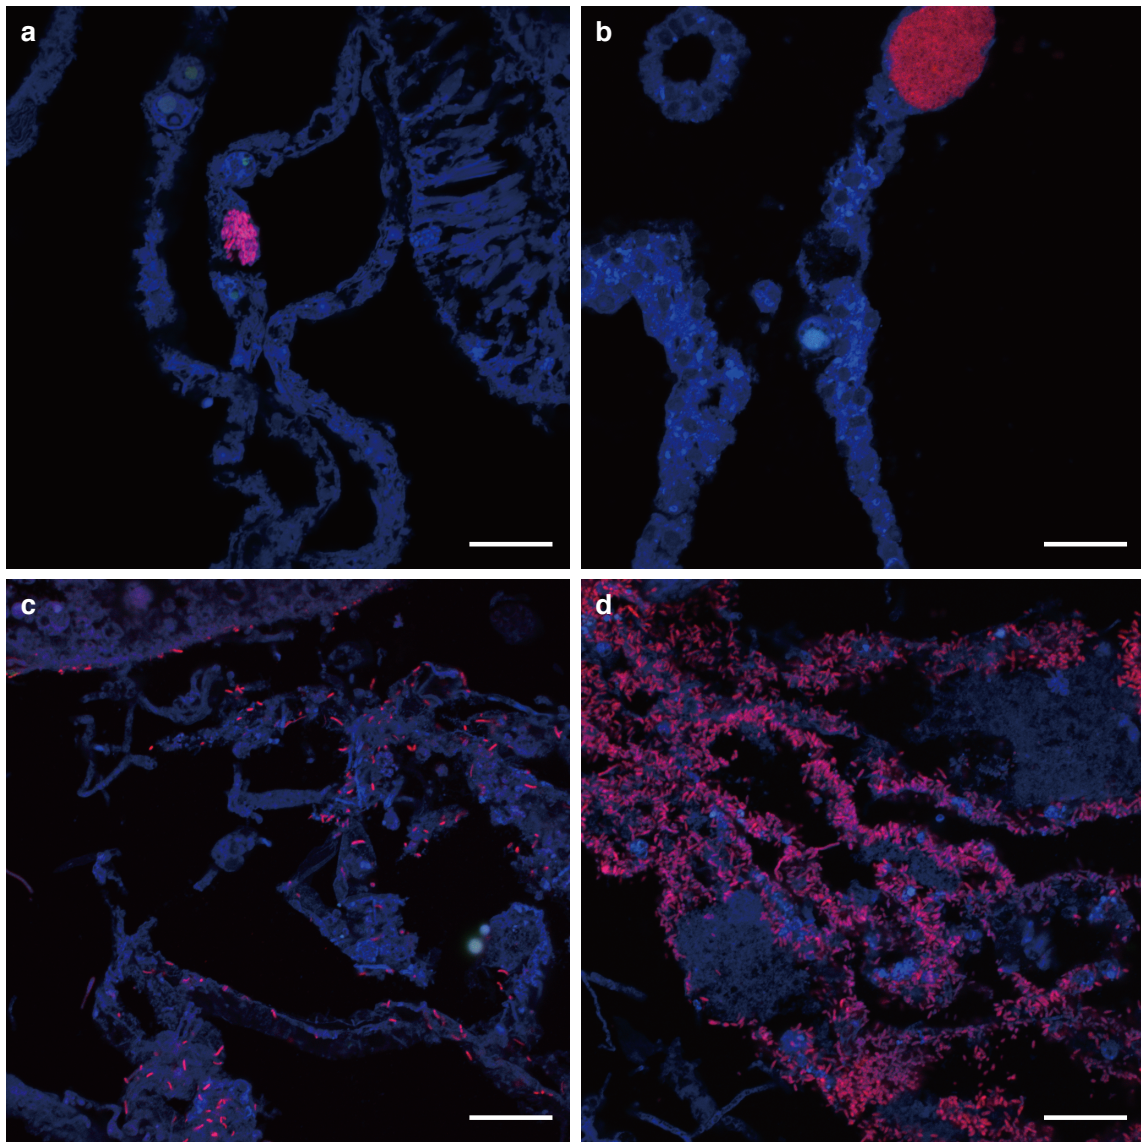

Supplementary Figure S2. Fluorescence in situ hybridisation micrographs of *Acropora hyacinthus* from a) HH tissue; b) HD tissue, D1 region; c) the lesion front, D2 region; and d) DD tissue, D3 region. Scale bars = 20  $\mu\text{m}$ ).

Supplementary Table S1. Comparison of proximate composition of samples types within locations. Values are presented as means  $\pm$  SEM. Values in the same row and group (i.e. location) that do not share the same superscripts are significantly different ( $p < 0.05$ ).

| <i>(mg g sample<sup>-1</sup>)</i>              | WA                           |                             |                              | PA                           |                               |                              | GBR                          |                              |                              |
|------------------------------------------------|------------------------------|-----------------------------|------------------------------|------------------------------|-------------------------------|------------------------------|------------------------------|------------------------------|------------------------------|
|                                                | DD                           | HD                          | HH                           | DD                           | HD                            | HH                           | DD                           | HD                           | HH                           |
| <b>Ash</b>                                     | 958 $\pm$ 4.67 <sup>a</sup>  | 942 $\pm$ 5.48 <sup>b</sup> | 910 $\pm$ 14.6 <sup>c</sup>  | 964 $\pm$ 1.61 <sup>a</sup>  | 945 $\pm$ 9.71 <sup>ab</sup>  | 934 $\pm$ 11 <sup>b</sup>    | 964 $\pm$ 2.31 <sup>a</sup>  | 952 $\pm$ 5.72 <sup>b</sup>  | 949 $\pm$ 2.4 <sup>b</sup>   |
| <b>AFDW</b>                                    | 158 $\pm$ 24.9 <sup>b</sup>  | 285 $\pm$ 34.3 <sup>a</sup> | 276 $\pm$ 55.3 <sup>ab</sup> | 114 $\pm$ 31 <sup>a</sup>    | 129 $\pm$ 29.6 <sup>a</sup>   | 223 $\pm$ 54.3 <sup>a</sup>  | 76.9 $\pm$ 11.5 <sup>b</sup> | 113 $\pm$ 15.2 <sup>a</sup>  | 134 $\pm$ 10.7 <sup>a</sup>  |
| <b>Lipid</b> ( <i>mg g AFDW<sup>-1</sup></i> ) | 6.89 $\pm$ 1.93 <sup>b</sup> | 17.2 $\pm$ 3.5 <sup>a</sup> | 23.6 $\pm$ 2.74 <sup>a</sup> | 4.15 $\pm$ 1.17 <sup>b</sup> | 7.78 $\pm$ 3.18 <sup>ab</sup> | 15.3 $\pm$ 4.84 <sup>a</sup> | 2.76 $\pm$ 0.44 <sup>c</sup> | 5.07 $\pm$ 0.74 <sup>b</sup> | 6.79 $\pm$ 0.54 <sup>a</sup> |

Supplementary Table S2. Comparison of proximate composition of sample types between locations. Values are presented as means  $\pm$  SEM. Values in the same row and group (i.e. sample type) that do not share the same superscripts are significantly different ( $p < 0.05$ ).

| <i>(mg g sample<sup>-1</sup>)</i>              | DD                           |                               |                              | HD                           |                              |                             | HH                           |                               |                              |
|------------------------------------------------|------------------------------|-------------------------------|------------------------------|------------------------------|------------------------------|-----------------------------|------------------------------|-------------------------------|------------------------------|
|                                                | GBR                          | PA                            | WA                           | GBR                          | PA                           | WA                          | GBR                          | PA                            | WA                           |
| <b>Ash</b>                                     | 964 $\pm$ 2.31 <sup>a</sup>  | 964 $\pm$ 1.61 <sup>ab</sup>  | 958 $\pm$ 4.67 <sup>b</sup>  | 952 $\pm$ 5.72 <sup>a</sup>  | 945 $\pm$ 9.71 <sup>a</sup>  | 942 $\pm$ 5.48 <sup>a</sup> | 949 $\pm$ 2.4 <sup>a</sup>   | 934 $\pm$ 11 <sup>b</sup>     | 910 $\pm$ 14.6 <sup>b</sup>  |
| <b>AFDW</b>                                    | 76.9 $\pm$ 11.5 <sup>b</sup> | 114 $\pm$ 31 <sup>ab</sup>    | 158 $\pm$ 24.9 <sup>a</sup>  | 113 $\pm$ 15.2 <sup>b</sup>  | 129 $\pm$ 29.6 <sup>b</sup>  | 285 $\pm$ 34.3 <sup>a</sup> | 134 $\pm$ 10.7 <sup>b</sup>  | 223 $\pm$ 54.3 <sup>ab</sup>  | 276 $\pm$ 55.3 <sup>a</sup>  |
| <b>Lipid</b> ( <i>mg g AFDW<sup>-1</sup></i> ) | 2.76 $\pm$ 0.44 <sup>b</sup> | 4.15 $\pm$ 1.17 <sup>ab</sup> | 6.89 $\pm$ 1.93 <sup>a</sup> | 5.07 $\pm$ 0.74 <sup>b</sup> | 7.78 $\pm$ 3.18 <sup>b</sup> | 17.2 $\pm$ 3.5 <sup>a</sup> | 6.79 $\pm$ 0.54 <sup>b</sup> | 15.3 $\pm$ 4.84 <sup>ab</sup> | 23.6 $\pm$ 2.74 <sup>a</sup> |

Supplementary Table S3. Comparison of lipid class composition (mg g lipid<sup>-1</sup>) between sample types within locations. Values are presented as means  $\pm$  SEM. Values in the same row and group (i.e. location) that do not share the same superscripts are significantly different ( $p < 0.05$ ).

| Class                                | WA                           |                              |                              | Palmyra                      |                              |                              | GBR                           |                              |                              |
|--------------------------------------|------------------------------|------------------------------|------------------------------|------------------------------|------------------------------|------------------------------|-------------------------------|------------------------------|------------------------------|
|                                      | DD                           | HD                           | HH                           | DD                           | HD                           | HH                           | DD                            | HD                           | HH                           |
| <b>WAX</b>                           | 83.6 $\pm$ 13.7 <sup>a</sup> | 86.9 $\pm$ 15.9 <sup>a</sup> | 114 $\pm$ 75.5 <sup>a</sup>  | 82 $\pm$ 18.2 <sup>a</sup>   | 76.4 $\pm$ 13 <sup>a</sup>   | 62.5 $\pm$ 21.2 <sup>a</sup> | 82.2 $\pm$ 7.04 <sup>b</sup>  | 76.5 $\pm$ 11 <sup>b</sup>   | 139 $\pm$ 20.9 <sup>a</sup>  |
| <b>TAG</b>                           | 344 $\pm$ 131 <sup>a</sup>   | 492 $\pm$ 77.7 <sup>a</sup>  | 462 $\pm$ 169 <sup>a</sup>   | 97.7 $\pm$ 42.5 <sup>a</sup> | 110 $\pm$ 44.9 <sup>a</sup>  | 325 $\pm$ 150 <sup>a</sup>   | 56.1 $\pm$ 6.5 <sup>a</sup>   | 73.9 $\pm$ 21.8 <sup>a</sup> | 117 $\pm$ 32.2 <sup>a</sup>  |
| <b>FFA</b>                           | 24 $\pm$ 3.23 <sup>a</sup>   | 30.8 $\pm$ 4.36 <sup>a</sup> | 17.9 $\pm$ 6.13 <sup>a</sup> | 26.3 $\pm$ 7.32 <sup>a</sup> | 26.6 $\pm$ 7.29 <sup>a</sup> | 62.3 $\pm$ 32 <sup>a</sup>   | 20.4 $\pm$ 3.13 <sup>b</sup>  | 25.1 $\pm$ 4.47 <sup>b</sup> | 38.4 $\pm$ 5.05 <sup>a</sup> |
| <b>1,2DAG</b>                        | 17.5 $\pm$ 17.5 <sup>a</sup> | 0 $\pm$ 0 <sup>a</sup>       | 9.34 $\pm$ 9.34 <sup>a</sup> | 11.5 $\pm$ 11.5 <sup>a</sup> | 35.4 $\pm$ 20.4 <sup>a</sup> | 7.93 $\pm$ 7.93 <sup>a</sup> | 105 $\pm$ 6.91 <sup>a</sup>   | 45.4 $\pm$ 10.1 <sup>b</sup> | 32.3 $\pm$ 11.6 <sup>b</sup> |
| <b>STEROL</b>                        | 43.6 $\pm$ 6.14 <sup>a</sup> | 33.2 $\pm$ 3.44 <sup>a</sup> | 44.7 $\pm$ 9.95 <sup>a</sup> | 65.9 $\pm$ 17 <sup>a</sup>   | 61.3 $\pm$ 12.9 <sup>a</sup> | 71.5 $\pm$ 38.3 <sup>a</sup> | 64.2 $\pm$ 5.49 <sup>a</sup>  | 66.4 $\pm$ 3.42 <sup>a</sup> | 68.2 $\pm$ 4 <sup>a</sup>    |
| <b>AMPL</b>                          | 353 $\pm$ 93.8 <sup>a</sup>  | 250 $\pm$ 66.5 <sup>a</sup>  | 229 $\pm$ 108 <sup>a</sup>   | 446 $\pm$ 103 <sup>a</sup>   | 469 $\pm$ 33.9 <sup>a</sup>  | 370 $\pm$ 132 <sup>a</sup>   | 414 $\pm$ 35.8 <sup>a</sup>   | 461 $\pm$ 33.9 <sup>a</sup>  | 380 $\pm$ 37.6 <sup>a</sup>  |
| <b>PE</b>                            | 46.7 $\pm$ 16 <sup>a</sup>   | 42.6 $\pm$ 7.48 <sup>a</sup> | 60.3 $\pm$ 32.2 <sup>a</sup> | 104 $\pm$ 29.7 <sup>a</sup>  | 76.7 $\pm$ 15.2 <sup>a</sup> | 60.9 $\pm$ 16.9 <sup>a</sup> | 113 $\pm$ 6.64 <sup>a</sup>   | 90.7 $\pm$ 5.49 <sup>b</sup> | 74.1 $\pm$ 6.05 <sup>b</sup> |
| <b>PSPI</b>                          | 10.4 $\pm$ 10.4 <sup>a</sup> | 11.8 $\pm$ 11.8 <sup>a</sup> | 5.67 $\pm$ 5.67 <sup>a</sup> | 0 $\pm$ 0 <sup>a</sup>       | 39.1 $\pm$ 27.2 <sup>a</sup> | 4.29 $\pm$ 4.29 <sup>a</sup> | 0 $\pm$ 0 <sup>a</sup>        | 27.7 $\pm$ 16.1 <sup>a</sup> | 18.7 $\pm$ 9.96 <sup>a</sup> |
| <b>PC</b>                            | 76.7 $\pm$ 11.4 <sup>a</sup> | 53.3 $\pm$ 9.46 <sup>a</sup> | 56.9 $\pm$ 16.9 <sup>a</sup> | 127 $\pm$ 35.8 <sup>a</sup>  | 103 $\pm$ 21.9 <sup>ab</sup> | 35.3 $\pm$ 15.3 <sup>b</sup> | 135 $\pm$ 6.83 <sup>a</sup>   | 133 $\pm$ 6.45 <sup>a</sup>  | 125 $\pm$ 8.68 <sup>a</sup>  |
| <b>LPC</b>                           | 0 $\pm$ 0                    | 0 $\pm$ 0                    | 0 $\pm$ 0                    | 39.2 $\pm$ 28.9 <sup>a</sup> | 3.18 $\pm$ 3.18 <sup>a</sup> | 0 $\pm$ 0 <sup>a</sup>       | 10.8 $\pm$ 7.37 <sup>a</sup>  | 0 $\pm$ 0 <sup>a</sup>       | 7.03 $\pm$ 7.03 <sup>a</sup> |
| <b><math>\Sigma</math>STORAGE</b>    | 469 $\pm$ 115 <sup>a</sup>   | 609 $\pm$ 84.1 <sup>a</sup>  | 604 $\pm$ 161 <sup>a</sup>   | 218 $\pm$ 45.6 <sup>a</sup>  | 248 $\pm$ 41.6 <sup>a</sup>  | 458 $\pm$ 147 <sup>a</sup>   | 263 $\pm$ 21.2 <sup>ab</sup>  | 221 $\pm$ 35.2 <sup>b</sup>  | 327 $\pm$ 38 <sup>a</sup>    |
| <b><math>\Sigma</math>STRUCTURAL</b> | 531 $\pm$ 115 <sup>a</sup>   | 391 $\pm$ 84.1 <sup>a</sup>  | 396 $\pm$ 161 <sup>a</sup>   | 782 $\pm$ 45.6 <sup>a</sup>  | 752 $\pm$ 41.6 <sup>a</sup>  | 542 $\pm$ 147 <sup>a</sup>   | 737 $\pm$ 21.2 <sup>ab</sup>  | 779 $\pm$ 35.2 <sup>a</sup>  | 673 $\pm$ 38 <sup>b</sup>    |
| <b>RATIO</b>                         | 1.38 $\pm$ 0.79 <sup>a</sup> | 2.01 $\pm$ 0.75 <sup>a</sup> | 2.55 $\pm$ 1.36 <sup>a</sup> | 0.29 $\pm$ 0.08 <sup>a</sup> | 0.34 $\pm$ 0.08 <sup>a</sup> | 1.41 $\pm$ 0.72 <sup>a</sup> | 0.37 $\pm$ 0.04 <sup>ab</sup> | 0.32 $\pm$ 0.09 <sup>b</sup> | 0.54 $\pm$ 0.11 <sup>a</sup> |

Supplementary Table S4. Comparison of lipid class composition (mg g lipid<sup>-1</sup>) of sample types between locations. Values are presented as means  $\pm$  SEM. Values in the same row and group (i.e. sample type) that do not share the same superscripts are significantly different ( $p < 0.05$ ).

| Class               | DD                           |                              |                              | HD                           |                               |                              | HH                           |                              |                              |
|---------------------|------------------------------|------------------------------|------------------------------|------------------------------|-------------------------------|------------------------------|------------------------------|------------------------------|------------------------------|
|                     | GBR                          | Palmyra                      | WA                           | GBR                          | Palmyra                       | WA                           | GBR                          | Palmyra                      | WA                           |
| WAX                 | 82.2 $\pm$ 7.04 <sup>a</sup> | 82 $\pm$ 18.2 <sup>a</sup>   | 83.6 $\pm$ 13.7 <sup>a</sup> | 76.5 $\pm$ 11 <sup>a</sup>   | 76.4 $\pm$ 13 <sup>a</sup>    | 86.9 $\pm$ 15.9 <sup>a</sup> | 139 $\pm$ 20.9 <sup>a</sup>  | 62.5 $\pm$ 21.2 <sup>b</sup> | 114 $\pm$ 75.5 <sup>ab</sup> |
| TAG                 | 56.1 $\pm$ 6.5 <sup>b</sup>  | 97.7 $\pm$ 42.5 <sup>b</sup> | 344 $\pm$ 131 <sup>a</sup>   | 73.9 $\pm$ 21.8 <sup>b</sup> | 110 $\pm$ 44.9 <sup>b</sup>   | 492 $\pm$ 77.7 <sup>a</sup>  | 117 $\pm$ 32.2 <sup>b</sup>  | 325 $\pm$ 150 <sup>ab</sup>  | 462 $\pm$ 169 <sup>a</sup>   |
| FFA                 | 20.4 $\pm$ 3.13 <sup>a</sup> | 26.3 $\pm$ 7.32 <sup>a</sup> | 24 $\pm$ 3.23 <sup>a</sup>   | 25.1 $\pm$ 4.47 <sup>a</sup> | 26.6 $\pm$ 7.29 <sup>a</sup>  | 30.8 $\pm$ 4.36 <sup>a</sup> | 38.4 $\pm$ 5.05 <sup>a</sup> | 62.3 $\pm$ 32 <sup>a</sup>   | 17.9 $\pm$ 6.13 <sup>b</sup> |
| 1,2DAG              | 105 $\pm$ 6.91 <sup>a</sup>  | 11.5 $\pm$ 11.5 <sup>b</sup> | 17.5 $\pm$ 17.5 <sup>b</sup> | 45.4 $\pm$ 10.1 <sup>a</sup> | 35.4 $\pm$ 20.4 <sup>ab</sup> | 0 $\pm$ 0 <sup>b</sup>       | 32.3 $\pm$ 11.6 <sup>a</sup> | 7.93 $\pm$ 7.93 <sup>a</sup> | 9.34 $\pm$ 9.34 <sup>a</sup> |
| STEROL              | 64.2 $\pm$ 5.49 <sup>a</sup> | 65.9 $\pm$ 17 <sup>a</sup>   | 43.6 $\pm$ 6.14 <sup>a</sup> | 66.4 $\pm$ 3.42 <sup>a</sup> | 61.3 $\pm$ 12.9 <sup>a</sup>  | 33.2 $\pm$ 3.44 <sup>b</sup> | 68.2 $\pm$ 4 <sup>a</sup>    | 71.5 $\pm$ 38.3 <sup>a</sup> | 44.7 $\pm$ 9.95 <sup>a</sup> |
| AMPL                | 414 $\pm$ 35.8 <sup>a</sup>  | 446 $\pm$ 103 <sup>a</sup>   | 353 $\pm$ 93.8 <sup>a</sup>  | 461 $\pm$ 33.9 <sup>a</sup>  | 469 $\pm$ 33.9 <sup>a</sup>   | 250 $\pm$ 66.5 <sup>b</sup>  | 380 $\pm$ 37.6 <sup>a</sup>  | 370 $\pm$ 132 <sup>a</sup>   | 229 $\pm$ 108 <sup>a</sup>   |
| PE                  | 113 $\pm$ 6.64 <sup>a</sup>  | 104 $\pm$ 29.7 <sup>ab</sup> | 46.7 $\pm$ 16 <sup>b</sup>   | 90.7 $\pm$ 5.49 <sup>a</sup> | 76.7 $\pm$ 15.2 <sup>a</sup>  | 42.6 $\pm$ 7.48 <sup>b</sup> | 74.1 $\pm$ 6.05 <sup>a</sup> | 60.9 $\pm$ 16.9 <sup>a</sup> | 60.3 $\pm$ 32.2 <sup>a</sup> |
| PSPI                | 0 $\pm$ 0 <sup>a</sup>       | 0 $\pm$ 0 <sup>a</sup>       | 10.4 $\pm$ 10.4 <sup>a</sup> | 27.7 $\pm$ 16.1 <sup>a</sup> | 39.1 $\pm$ 27.2 <sup>a</sup>  | 11.8 $\pm$ 11.8 <sup>a</sup> | 18.7 $\pm$ 9.96 <sup>a</sup> | 4.29 $\pm$ 4.29 <sup>a</sup> | 5.67 $\pm$ 5.67 <sup>a</sup> |
| PC                  | 135 $\pm$ 6.83 <sup>a</sup>  | 127 $\pm$ 35.8 <sup>ab</sup> | 76.7 $\pm$ 11.4 <sup>b</sup> | 133 $\pm$ 6.45 <sup>a</sup>  | 103 $\pm$ 21.9 <sup>ab</sup>  | 53.3 $\pm$ 9.46 <sup>b</sup> | 125 $\pm$ 8.68 <sup>a</sup>  | 35.3 $\pm$ 15.3 <sup>b</sup> | 56.9 $\pm$ 16.9 <sup>b</sup> |
| LPC                 | 10.8 $\pm$ 7.37 <sup>a</sup> | 39.2 $\pm$ 28.9 <sup>a</sup> | 0 $\pm$ 0 <sup>a</sup>       | 0 $\pm$ 0 <sup>a</sup>       | 3.18 $\pm$ 3.18 <sup>a</sup>  | 0 $\pm$ 0 <sup>a</sup>       | 7.03 $\pm$ 7.03 <sup>a</sup> | 0 $\pm$ 0 <sup>a</sup>       | 0 $\pm$ 0 <sup>a</sup>       |
| $\Sigma$ STORAGE    | 263 $\pm$ 21.2 <sup>b</sup>  | 218 $\pm$ 45.6 <sup>b</sup>  | 469 $\pm$ 115 <sup>a</sup>   | 221 $\pm$ 35.2 <sup>b</sup>  | 248 $\pm$ 41.6 <sup>b</sup>   | 609 $\pm$ 84.1 <sup>a</sup>  | 327 $\pm$ 38 <sup>a</sup>    | 458 $\pm$ 147 <sup>a</sup>   | 604 $\pm$ 161 <sup>a</sup>   |
| $\Sigma$ STRUCTURAL | 737 $\pm$ 21.2 <sup>a</sup>  | 782 $\pm$ 45.6 <sup>a</sup>  | 531 $\pm$ 115 <sup>b</sup>   | 779 $\pm$ 35.2 <sup>a</sup>  | 752 $\pm$ 41.6 <sup>a</sup>   | 391 $\pm$ 84.1 <sup>b</sup>  | 673 $\pm$ 38 <sup>a</sup>    | 542 $\pm$ 147 <sup>a</sup>   | 396 $\pm$ 161 <sup>a</sup>   |
| RATIO               | 0.37 $\pm$ 0.04 <sup>b</sup> | 0.29 $\pm$ 0.08 <sup>b</sup> | 1.38 $\pm$ 0.79 <sup>a</sup> | 0.32 $\pm$ 0.09 <sup>b</sup> | 0.34 $\pm$ 0.08 <sup>b</sup>  | 2.01 $\pm$ 0.75 <sup>a</sup> | 0.54 $\pm$ 0.11 <sup>a</sup> | 1.41 $\pm$ 0.72 <sup>a</sup> | 2.55 $\pm$ 1.36 <sup>a</sup> |

Supplementary Table S5. Comparison of fatty acid composition (mg g lipid<sup>-1</sup>) between sample types within locations. Values are presented as means  $\pm$  SEM. Values in the same row and group (i.e. location) that do not share the same superscripts are significantly different ( $p < 0.05$ ).

| Fatty acid      | WA                           |                              |                               | Palmyra                      |                              |                              | GBR                          |                               |                              |
|-----------------|------------------------------|------------------------------|-------------------------------|------------------------------|------------------------------|------------------------------|------------------------------|-------------------------------|------------------------------|
|                 | DD                           | HD                           | HH                            | DD                           | HD                           | HH                           | DD                           | HD                            | HH                           |
| <b>6:0</b>      | 0.15 $\pm$ 0.07 <sup>a</sup> | 0.06 $\pm$ 0.04 <sup>a</sup> | 0.02 $\pm$ 0.02 <sup>a</sup>  | 0.13 $\pm$ 0.13 <sup>a</sup> | 0.16 $\pm$ 0.1 <sup>a</sup>  | 0.09 $\pm$ 0.05 <sup>a</sup> | 0.39 $\pm$ 0.12 <sup>a</sup> | 0.14 $\pm$ 0.05 <sup>a</sup>  | 0.13 $\pm$ 0.03 <sup>a</sup> |
| <b>8:0</b>      | 0.01 $\pm$ 0.01 <sup>a</sup> | 0.03 $\pm$ 0.02 <sup>a</sup> | 0 $\pm$ 0 <sup>a</sup>        |                              |                              |                              |                              |                               |                              |
| <b>10:0</b>     | 0.07 $\pm$ 0.03 <sup>b</sup> | 0.27 $\pm$ 0.12 <sup>a</sup> | 0.14 $\pm$ 0.04 <sup>ab</sup> | 0 $\pm$ 0 <sup>a</sup>       | 0.02 $\pm$ 0.02 <sup>a</sup> | 0.03 $\pm$ 0.02 <sup>a</sup> | 0.01 $\pm$ 0.01 <sup>b</sup> | 0.06 $\pm$ 0.03 <sup>b</sup>  | 2.14 $\pm$ 0.94 <sup>a</sup> |
| <b>11:0</b>     | 0.01 $\pm$ 0.01 <sup>a</sup> | 0 $\pm$ 0 <sup>a</sup>       | 0.04 $\pm$ 0.02 <sup>a</sup>  | 0 $\pm$ 0 <sup>a</sup>       | 0.02 $\pm$ 0.02 <sup>a</sup> | 0.01 $\pm$ 0.01 <sup>a</sup> | 0 $\pm$ 0 <sup>a</sup>       | 0 $\pm$ 0 <sup>a</sup>        | 0.02 $\pm$ 0.02 <sup>a</sup> |
| <b>12:0</b>     | 0.56 $\pm$ 0.16 <sup>a</sup> | 0.55 $\pm$ 0.03 <sup>a</sup> | 0.77 $\pm$ 0.16 <sup>a</sup>  | 0.34 $\pm$ 0.2 <sup>a</sup>  | 0.48 $\pm$ 0.05 <sup>a</sup> | 0.32 $\pm$ 0.04 <sup>a</sup> | 1.05 $\pm$ 0.26 <sup>a</sup> | 0.88 $\pm$ 0.12 <sup>a</sup>  | 1.04 $\pm$ 0.13 <sup>a</sup> |
| <b>13:0</b>     | 0.21 $\pm$ 0.05 <sup>a</sup> | 0.16 $\pm$ 0.03 <sup>a</sup> | 0.16 $\pm$ 0.09 <sup>a</sup>  | 0.13 $\pm$ 0.07 <sup>a</sup> | 0.32 $\pm$ 0.07 <sup>a</sup> | 0.26 $\pm$ 0.11 <sup>a</sup> | 0.08 $\pm$ 0.04 <sup>b</sup> | 0.25 $\pm$ 0.03 <sup>a</sup>  | 0.26 $\pm$ 0.07 <sup>a</sup> |
| <b>14:0</b>     | 14 $\pm$ 3.95 <sup>a</sup>   | 19.9 $\pm$ 2.18 <sup>a</sup> | 16.6 $\pm$ 4.28 <sup>a</sup>  | 10.1 $\pm$ 3.86 <sup>a</sup> | 14.7 $\pm$ 2.39 <sup>a</sup> | 18.6 $\pm$ 5.14 <sup>a</sup> | 7.39 $\pm$ 0.72 <sup>b</sup> | 8.88 $\pm$ 0.87 <sup>ab</sup> | 12.8 $\pm$ 2.15 <sup>a</sup> |
| <b>15:0</b>     | 0.34 $\pm$ 0.1 <sup>a</sup>  | 0.22 $\pm$ 0.01 <sup>a</sup> | 0.15 $\pm$ 0.03 <sup>a</sup>  | 0.25 $\pm$ 0.11 <sup>a</sup> | 0.31 $\pm$ 0.05 <sup>a</sup> | 0.35 $\pm$ 0.17 <sup>a</sup> | 0.64 $\pm$ 0.09 <sup>a</sup> | 0.4 $\pm$ 0.05 <sup>b</sup>   | 0.39 $\pm$ 0.04 <sup>b</sup> |
| <b>16:0</b>     | 160 $\pm$ 53.4 <sup>a</sup>  | 221 $\pm$ 45 <sup>a</sup>    | 201 $\pm$ 53 <sup>a</sup>     | 97.7 $\pm$ 26.3 <sup>a</sup> | 114 $\pm$ 19.9 <sup>a</sup>  | 165 $\pm$ 44.1 <sup>a</sup>  | 76.2 $\pm$ 7.47 <sup>b</sup> | 82.1 $\pm$ 9.97 <sup>b</sup>  | 121 $\pm$ 15.6 <sup>a</sup>  |
| <b>17:0</b>     | 0.28 $\pm$ 0.14 <sup>a</sup> | 0.52 $\pm$ 0.14 <sup>a</sup> | 0.46 $\pm$ 0.16 <sup>a</sup>  | 1.83 $\pm$ 1.03 <sup>a</sup> | 0.31 $\pm$ 0.09 <sup>a</sup> | 0.44 $\pm$ 0.23 <sup>a</sup> | 1.68 $\pm$ 0.31 <sup>a</sup> | 0.56 $\pm$ 0.12 <sup>b</sup>  | 0.44 $\pm$ 0.13 <sup>b</sup> |
| <b>18:0</b>     | 17.7 $\pm$ 3.61 <sup>a</sup> | 23.6 $\pm$ 3.88 <sup>a</sup> | 22.3 $\pm$ 3.31 <sup>a</sup>  | 32.3 $\pm$ 9.23 <sup>a</sup> | 25.7 $\pm$ 3.42 <sup>a</sup> | 30.3 $\pm$ 5.89 <sup>a</sup> | 25.3 $\pm$ 3.71 <sup>a</sup> | 28.2 $\pm$ 1.5 <sup>a</sup>   | 27.9 $\pm$ 1.23 <sup>a</sup> |
| <b>20:0</b>     | 3.12 $\pm$ 0.68 <sup>a</sup> | 3.7 $\pm$ 0.22 <sup>a</sup>  | 3.2 $\pm$ 0.42 <sup>a</sup>   | 3.62 $\pm$ 0.88 <sup>a</sup> | 3.54 $\pm$ 0.48 <sup>a</sup> | 4.36 $\pm$ 0.94 <sup>a</sup> | 3.91 $\pm$ 0.33 <sup>a</sup> | 3.66 $\pm$ 0.2 <sup>a</sup>   | 3.82 $\pm$ 0.19 <sup>a</sup> |
| <b>21:0</b>     | 0.48 $\pm$ 0.22 <sup>a</sup> | 0.22 $\pm$ 0.06 <sup>a</sup> | 0.18 $\pm$ 0.05 <sup>a</sup>  | 1.16 $\pm$ 0.63 <sup>a</sup> | 0.37 $\pm$ 0.04 <sup>a</sup> | 0.27 $\pm$ 0.06 <sup>a</sup> | 0.99 $\pm$ 0.17 <sup>a</sup> | 0.54 $\pm$ 0.06 <sup>b</sup>  | 0.39 $\pm$ 0.05 <sup>b</sup> |
| <b>22:0</b>     | 1.45 $\pm$ 0.33 <sup>a</sup> | 1.25 $\pm$ 0.46 <sup>a</sup> | 1.16 $\pm$ 0.34 <sup>a</sup>  | 7.39 $\pm$ 4 <sup>a</sup>    | 1.95 $\pm$ 0.15 <sup>a</sup> | 1.38 $\pm$ 0.52 <sup>a</sup> | 5.69 $\pm$ 1.11 <sup>a</sup> | 2.8 $\pm$ 0.34 <sup>b</sup>   | 2.34 $\pm$ 0.43 <sup>b</sup> |
| <b>24:0</b>     | 0.64 $\pm$ 0.13 <sup>a</sup> | 0.43 $\pm$ 0.11 <sup>a</sup> | 0.37 $\pm$ 0.11 <sup>a</sup>  | 3.26 $\pm$ 1.66 <sup>a</sup> | 0.72 $\pm$ 0.12 <sup>a</sup> | 0.56 $\pm$ 0.26 <sup>a</sup> | 2.81 $\pm$ 0.66 <sup>a</sup> | 1.25 $\pm$ 0.2 <sup>b</sup>   | 0.88 $\pm$ 0.16 <sup>b</sup> |
| <b>14:1n-5</b>  | 0.4 $\pm$ 0.19 <sup>a</sup>  | 0.66 $\pm$ 0.29 <sup>a</sup> | 0.41 $\pm$ 0.36 <sup>a</sup>  | 0.4 $\pm$ 0.27 <sup>a</sup>  | 0.83 $\pm$ 0.24 <sup>a</sup> | 0.26 $\pm$ 0.09 <sup>a</sup> | 1.64 $\pm$ 0.6 <sup>a</sup>  | 1.77 $\pm$ 0.34 <sup>a</sup>  | 1.43 $\pm$ 0.33 <sup>a</sup> |
| <b>15:1n-5</b>  | 0.48 $\pm$ 0.12 <sup>a</sup> | 0.68 $\pm$ 0.14 <sup>a</sup> | 0.67 $\pm$ 0.1 <sup>a</sup>   | 0.18 $\pm$ 0.11 <sup>a</sup> | 0.56 $\pm$ 0.07 <sup>a</sup> | 0.32 $\pm$ 0.15 <sup>a</sup> | 1 $\pm$ 0.35 <sup>a</sup>    | 1.08 $\pm$ 0.23 <sup>a</sup>  | 1.05 $\pm$ 0.25 <sup>a</sup> |
| <b>16:1n-7</b>  | 14.6 $\pm$ 6.47 <sup>a</sup> | 19.3 $\pm$ 6.86 <sup>a</sup> | 16.6 $\pm$ 5.8 <sup>a</sup>   | 2.82 $\pm$ 1.08 <sup>a</sup> | 4.65 $\pm$ 0.61 <sup>a</sup> | 6.29 $\pm$ 1.56 <sup>a</sup> | 3.05 $\pm$ 0.25 <sup>a</sup> | 3.3 $\pm$ 0.28 <sup>a</sup>   | 5.78 $\pm$ 1.32 <sup>a</sup> |
| <b>17:1n-7</b>  | 23 $\pm$ 6.88 <sup>a</sup>   | 10.9 $\pm$ 10.9 <sup>a</sup> | 3.99 $\pm$ 3.99 <sup>a</sup>  | 6.88 $\pm$ 5.2 <sup>a</sup>  | 17.6 $\pm$ 4.67 <sup>a</sup> | 19.4 $\pm$ 8.83 <sup>a</sup> | 8.62 $\pm$ 0.94 <sup>a</sup> | 11.6 $\pm$ 1.9 <sup>a</sup>   | 17.9 $\pm$ 5.19 <sup>a</sup> |
| <b>18:1n-7</b>  | 1.25 $\pm$ 0.3 <sup>a</sup>  | 1.09 $\pm$ 0.31 <sup>a</sup> | 0.98 $\pm$ 0.29 <sup>a</sup>  | 0.32 $\pm$ 0.11 <sup>b</sup> | 0.46 $\pm$ 0.06 <sup>b</sup> | 2.41 $\pm$ 1.38 <sup>a</sup> | 1.4 $\pm$ 0.27 <sup>a</sup>  | 2.07 $\pm$ 1.48 <sup>b</sup>  | 0.61 $\pm$ 0.08 <sup>b</sup> |
| <b>18:1n-7t</b> | 0.03 $\pm$ 0.02 <sup>b</sup> | 0.04 $\pm$ 0.04 <sup>b</sup> | 0.5 $\pm$ 0.2 <sup>a</sup>    | 0 $\pm$ 0 <sup>a</sup>       | 0.07 $\pm$ 0.04 <sup>a</sup> | 0.19 $\pm$ 0.12 <sup>a</sup> | 0.01 $\pm$ 0.01 <sup>a</sup> | 0.05 $\pm$ 0.05 <sup>a</sup>  | 0.1 $\pm$ 0.06 <sup>a</sup>  |
| <b>18:1n-9</b>  | 23.6 $\pm$ 9.22 <sup>a</sup> | 31 $\pm$ 10.5 <sup>a</sup>   | 31.3 $\pm$ 10.2 <sup>a</sup>  | 6.82 $\pm$ 1.31 <sup>b</sup> | 6.89 $\pm$ 1.13 <sup>b</sup> | 13.8 $\pm$ 2.38 <sup>a</sup> | 7.71 $\pm$ 0.55 <sup>b</sup> | 13 $\pm$ 5.89 <sup>b</sup>    | 14.4 $\pm$ 2.71 <sup>a</sup> |
| <b>18:1n-9t</b> | 0.01 $\pm$ 0.01 <sup>b</sup> | 0.24 $\pm$ 0.11 <sup>a</sup> | 0.51 $\pm$ 0.24 <sup>a</sup>  | 0 $\pm$ 0 <sup>b</sup>       | 0.11 $\pm$ 0.09 <sup>b</sup> | 1.43 $\pm$ 1.16 <sup>a</sup> | 0.11 $\pm$ 0.11 <sup>a</sup> | 4.57 $\pm$ 2.98 <sup>a</sup>  | 0.22 $\pm$ 0.13 <sup>a</sup> |

|                 |                          |                          |                          |                          |                           |                          |                           |                           |                           |
|-----------------|--------------------------|--------------------------|--------------------------|--------------------------|---------------------------|--------------------------|---------------------------|---------------------------|---------------------------|
| <b>20:1n-9</b>  | 7.81 ± 2.51 <sup>a</sup> | 5.45 ± 3.63 <sup>a</sup> | 9.8 ± 2.13 <sup>a</sup>  | 2.12 ± 0.43 <sup>a</sup> | 3.05 ± 0.61 <sup>a</sup>  | 4.48 ± 1.45 <sup>a</sup> | 2.93 ± 0.27 <sup>b</sup>  | 3.82 ± 0.4 <sup>b</sup>   | 5.57 ± 0.59 <sup>a</sup>  |
| <b>22:1n-9</b>  | 0.52 ± 0.11 <sup>a</sup> | 0.38 ± 0.03 <sup>a</sup> | 0.72 ± 0.22 <sup>a</sup> | 4.37 ± 1.99 <sup>a</sup> | 1.53 ± 0.33 <sup>ab</sup> | 1.43 ± 0.66 <sup>b</sup> | 2.56 ± 0.62 <sup>a</sup>  | 1.2 ± 0.28 <sup>b</sup>   | 0.96 ± 0.34 <sup>b</sup>  |
| <b>24:1n-9</b>  | 0.18 ± 0.12 <sup>a</sup> | 0.07 ± 0.02 <sup>a</sup> | 0.11 ± 0.05 <sup>a</sup> | 0 ± 0 <sup>a</sup>       | 0.08 ± 0.06 <sup>a</sup>  | 0.05 ± 0.04 <sup>a</sup> | 0.04 ± 0.03 <sup>a</sup>  | 0.01 ± 0.01 <sup>a</sup>  | 0.07 ± 0.03 <sup>a</sup>  |
| <b>20:1n-11</b> | 0.46 ± 0.25 <sup>a</sup> | 0.48 ± 0.27 <sup>a</sup> | 0.64 ± 0.22 <sup>a</sup> |                          |                           |                          |                           |                           |                           |
| <b>22:1n-11</b> | 0.23 ± 0.07 <sup>a</sup> | 0.15 ± 0.04 <sup>a</sup> | 0.15 ± 0.03 <sup>a</sup> | 0.13 ± 0.09 <sup>a</sup> | 0.12 ± 0.06 <sup>a</sup>  | 0.09 ± 0.03 <sup>a</sup> | 0.28 ± 0.1 <sup>a</sup>   | 0.24 ± 0.14 <sup>a</sup>  | 0.13 ± 0.02 <sup>a</sup>  |
| <b>18:3n-3</b>  | 0.21 ± 0.05 <sup>a</sup> | 0.15 ± 0.04 <sup>a</sup> | 0.13 ± 0.02 <sup>a</sup> | 0.02 ± 0.02 <sup>a</sup> | 0.02 ± 0.02 <sup>a</sup>  | 0.06 ± 0.04 <sup>a</sup> | 0.31 ± 0.12 <sup>a</sup>  | 0.16 ± 0.09 <sup>a</sup>  | 0.1 ± 0.03 <sup>a</sup>   |
| <b>18:4n-3</b>  | 5.14 ± 1.83 <sup>a</sup> | 9.04 ± 0.84 <sup>a</sup> | 7.84 ± 1.34 <sup>a</sup> | 4.71 ± 0.37 <sup>a</sup> | 7.99 ± 1.67 <sup>a</sup>  | 6.14 ± 1.27 <sup>a</sup> | 3.8 ± 0.46 <sup>b</sup>   | 6.43 ± 0.7 <sup>a</sup>   | 6.66 ± 0.61 <sup>a</sup>  |
| <b>20:4n-3</b>  | 0.44 ± 0.17 <sup>a</sup> | 0.7 ± 0.16 <sup>a</sup>  | 0.46 ± 0.23 <sup>a</sup> | 0 ± 0 <sup>a</sup>       | 0.12 ± 0.12 <sup>a</sup>  | 0.43 ± 0.25 <sup>a</sup> | 0.08 ± 0.05 <sup>b</sup>  | 0.22 ± 0.08 <sup>ab</sup> | 0.42 ± 0.1 <sup>a</sup>   |
| <b>20:5n-3</b>  | 15.8 ± 3.82 <sup>a</sup> | 24.2 ± 2.73 <sup>a</sup> | 23.8 ± 0.68 <sup>a</sup> | 18.6 ± 3.17 <sup>a</sup> | 29 ± 5.85 <sup>a</sup>    | 19.1 ± 3.8 <sup>a</sup>  | 13.9 ± 1.28 <sup>c</sup>  | 22.7 ± 1.24 <sup>b</sup>  | 26 ± 1.32 <sup>a</sup>    |
| <b>22:3n-3</b>  | 0 ± 0 <sup>a</sup>       | 3.29 ± 3.29 <sup>a</sup> | 0 ± 0 <sup>a</sup>       |                          |                           |                          | 0 ± 0 <sup>a</sup>        | 2.74 ± 1.86 <sup>a</sup>  | 3.99 ± 2.04 <sup>a</sup>  |
| <b>22:5n-3</b>  | 4.24 ± 0.96 <sup>a</sup> | 5.88 ± 0.22 <sup>a</sup> | 5.77 ± 0.61 <sup>a</sup> | 8.73 ± 3.38 <sup>a</sup> | 7.08 ± 1.24 <sup>a</sup>  | 4.82 ± 0.69 <sup>a</sup> | 5.33 ± 0.65 <sup>b</sup>  | 6.46 ± 0.6 <sup>a</sup>   | 7.36 ± 0.57 <sup>a</sup>  |
| <b>22:6n-3</b>  | 18.5 ± 6.26 <sup>a</sup> | 27.5 ± 4.93 <sup>a</sup> | 23.8 ± 5.87 <sup>a</sup> | 7.83 ± 2.06 <sup>b</sup> | 13.4 ± 2.28 <sup>ab</sup> | 15.1 ± 3.56 <sup>a</sup> | 6.18 ± 0.69 <sup>b</sup>  | 9.55 ± 0.56 <sup>a</sup>  | 10.3 ± 0.68 <sup>a</sup>  |
| <b>24:5n-3</b>  | 0 ± 0 <sup>a</sup>       | 0.1 ± 0.08 <sup>a</sup>  | 0.01 ± 0.01 <sup>a</sup> | 0 ± 0 <sup>a</sup>       | 0.02 ± 0.02 <sup>a</sup>  | 0.03 ± 0.02 <sup>a</sup> | 0 ± 0 <sup>a</sup>        | 0 ± 0 <sup>a</sup>        | 0.03 ± 0.03 <sup>a</sup>  |
| <b>24:6n-3</b>  | 0.05 ± 0.04 <sup>a</sup> | 0.11 ± 0 <sup>a</sup>    | 0.09 ± 0.02 <sup>a</sup> | 0 ± 0 <sup>b</sup>       | 0.05 ± 0.03 <sup>ab</sup> | 0.09 ± 0.03 <sup>a</sup> | 0.03 ± 0.03 <sup>a</sup>  | 0 ± 0 <sup>a</sup>        | 0.02 ± 0.01 <sup>a</sup>  |
| <b>16:2n-4</b>  | 1.19 ± 0.4 <sup>a</sup>  | 0.03 ± 0.03 <sup>a</sup> | 1.26 ± 0.63 <sup>a</sup> | 1.92 ± 0.57 <sup>a</sup> | 0.56 ± 0.56 <sup>ab</sup> | 0.27 ± 0.27 <sup>b</sup> | 1.78 ± 0.18 <sup>a</sup>  | 1.39 ± 0.49 <sup>ab</sup> | 0.57 ± 0.37 <sup>b</sup>  |
| <b>16:3n-4</b>  | 1.17 ± 0.73 <sup>a</sup> | 3.14 ± 0.72 <sup>a</sup> | 2.73 ± 1.24 <sup>a</sup> | 0 ± 0 <sup>b</sup>       | 0.73 ± 0.42 <sup>ab</sup> | 1.81 ± 0.84 <sup>a</sup> | 0.04 ± 0.04 <sup>b</sup>  | 0.18 ± 0.12 <sup>ab</sup> | 1.23 ± 0.65 <sup>a</sup>  |
| <b>18:2n-6</b>  | 7.17 ± 2.28 <sup>a</sup> | 9.42 ± 1.51 <sup>a</sup> | 7.78 ± 1.75 <sup>a</sup> | 2.63 ± 0.58 <sup>a</sup> | 2.63 ± 0.41 <sup>a</sup>  | 3.91 ± 1.07 <sup>a</sup> | 2.64 ± 0.22 <sup>ab</sup> | 2.69 ± 0.24 <sup>b</sup>  | 3.68 ± 0.48 <sup>a</sup>  |
| <b>18:2n-6t</b> | 0.35 ± 0.07 <sup>a</sup> | 0.01 ± 0.01 <sup>c</sup> | 0.05 ± 0.01 <sup>b</sup> | 0 ± 0 <sup>a</sup>       | 0 ± 0 <sup>a</sup>        | 0.04 ± 0.02 <sup>a</sup> | 0.08 ± 0.06 <sup>a</sup>  | 0 ± 0 <sup>a</sup>        | 0.06 ± 0.05 <sup>a</sup>  |
| <b>18:3n-6</b>  | 29.6 ± 11.5 <sup>a</sup> | 43.3 ± 9.99 <sup>a</sup> | 37.7 ± 12.2 <sup>a</sup> | 8.44 ± 3.03 <sup>a</sup> | 14.4 ± 2.6 <sup>a</sup>   | 19.3 ± 5.71 <sup>a</sup> | 7.94 ± 0.89 <sup>c</sup>  | 10.5 ± 0.75 <sup>b</sup>  | 18.7 ± 3.05 <sup>a</sup>  |
| <b>20:2n-6</b>  | 1.71 ± 0.37 <sup>a</sup> | 1.85 ± 0.13 <sup>a</sup> | 1.74 ± 0.18 <sup>a</sup> | 0.89 ± 0.14 <sup>a</sup> | 1.22 ± 0.17 <sup>a</sup>  | 1.18 ± 0.19 <sup>a</sup> | 1.01 ± 0.09 <sup>b</sup>  | 1.32 ± 0.09 <sup>a</sup>  | 1.18 ± 0.08 <sup>ab</sup> |
| <b>20:3n-6</b>  | 3.71 ± 1.13 <sup>a</sup> | 5.2 ± 1.19 <sup>a</sup>  | 4.48 ± 1.23 <sup>a</sup> | 1.21 ± 0.7 <sup>a</sup>  | 1.22 ± 0.53 <sup>a</sup>  | 2.67 ± 1 <sup>a</sup>    | 0.31 ± 0.17 <sup>c</sup>  | 0.89 ± 0.19 <sup>b</sup>  | 1.76 ± 0.32 <sup>a</sup>  |
| <b>20:4n-6</b>  | 12.8 ± 1.9 <sup>a</sup>  | 13.5 ± 2.07 <sup>a</sup> | 15.1 ± 3.24 <sup>a</sup> | 16.1 ± 3.85 <sup>a</sup> | 19.2 ± 2.37 <sup>a</sup>  | 10.8 ± 1.79 <sup>a</sup> | 18 ± 1.75 <sup>b</sup>    | 27.2 ± 1.75 <sup>a</sup>  | 26.7 ± 1.07 <sup>a</sup>  |
| <b>22:2n-6</b>  | 0.03 ± 0.03 <sup>a</sup> | 0.04 ± 0.02 <sup>a</sup> | 0.03 ± 0 <sup>a</sup>    | 0 ± 0 <sup>b</sup>       | 0 ± 0 <sup>b</sup>        | 0.05 ± 0.03 <sup>a</sup> | 0.05 ± 0.04 <sup>a</sup>  | 0.02 ± 0.02 <sup>a</sup>  | 0.01 ± 0.01 <sup>a</sup>  |
| <b>22:4n-6</b>  | 6.06 ± 1.01 <sup>a</sup> | 4.42 ± 2.31 <sup>a</sup> | 8.75 ± 2.17 <sup>a</sup> | 7.89 ± 1.68 <sup>a</sup> | 9.4 ± 1.23 <sup>a</sup>   | 6.86 ± 1.37 <sup>a</sup> | 7.28 ± 0.92 <sup>a</sup>  | 10.2 ± 1.63 <sup>a</sup>  | 8.24 ± 1.88 <sup>a</sup>  |
| <b>22:5n-6</b>  | 0.14 ± 0.14 <sup>a</sup> | 0 ± 0 <sup>a</sup>       | 0.02 ± 0.02 <sup>a</sup> |                          |                           |                          | 0.02 ± 0.02 <sup>a</sup>  | 0 ± 0 <sup>a</sup>        | 0.03 ± 0.02 <sup>a</sup>  |
| <b>Total</b>    | 380 ± 115 <sup>a</sup>   | 495 ± 81.4 <sup>a</sup>  | 454 ± 91.2 <sup>a</sup>  | 261 ± 49.9 <sup>a</sup>  | 306 ± 40.1 <sup>a</sup>   | 364 ± 71.2 <sup>a</sup>  | 224 ± 19.8 <sup>b</sup>   | 275 ± 18.4 <sup>a</sup>   | 339 ± 29.2 <sup>a</sup>   |
| <b>ΣSFA</b>     | 199 ± 60.2 <sup>a</sup>  | 272 ± 43.1 <sup>a</sup>  | 246 ± 57.2 <sup>a</sup>  | 158 ± 36 <sup>a</sup>    | 163 ± 25.4 <sup>a</sup>   | 222 ± 55.4 <sup>a</sup>  | 126 ± 13.6 <sup>b</sup>   | 130 ± 11.9 <sup>b</sup>   | 174 ± 19.5 <sup>a</sup>   |
| <b>ΣMUFA</b>    | 72.6 ± 25.3 <sup>a</sup> | 70.5 ± 23.6 <sup>a</sup> | 66.4 ± 14.9 <sup>a</sup> | 24 ± 6.94 <sup>b</sup>   | 35.9 ± 7 <sup>ab</sup>    | 50.2 ± 4.82 <sup>a</sup> | 29.3 ± 2.37 <sup>b</sup>  | 42.7 ± 10.6 <sup>b</sup>  | 48.2 ± 6.19 <sup>a</sup>  |
| <b>ΣPUFA</b>    | 108 ± 30.3 <sup>a</sup>  | 152 ± 18 <sup>a</sup>    | 142 ± 19.7 <sup>a</sup>  | 78.9 ± 11.3 <sup>a</sup> | 107 ± 14.3 <sup>a</sup>   | 92.7 ± 17.2 <sup>a</sup> | 68.8 ± 5.82 <sup>b</sup>  | 103 ± 3.92 <sup>a</sup>   | 117 ± 6.42 <sup>a</sup>   |
| <b>ΣTRANS</b>   | 0.39 ± 0.05 <sup>a</sup> | 0.29 ± 0.09 <sup>a</sup> | 1.06 ± 0.43 <sup>a</sup> | 0 ± 0 <sup>b</sup>       | 0.18 ± 0.12 <sup>ab</sup> | 1.66 ± 1.13 <sup>a</sup> | 0.2 ± 0.11 <sup>a</sup>   | 4.61 ± 2.98 <sup>a</sup>  | 0.38 ± 0.18 <sup>a</sup>  |



|                      |                          |                          |                          |                          |                          |                          |                          |                           |                          |
|----------------------|--------------------------|--------------------------|--------------------------|--------------------------|--------------------------|--------------------------|--------------------------|---------------------------|--------------------------|
| $\Sigma$ n-3 PUFA    | 44.4 ± 12.7 <sup>a</sup> | 70.9 ± 8.06 <sup>a</sup> | 61.9 ± 7.4 <sup>a</sup>  | 39.9 ± 6.65 <sup>a</sup> | 57.6 ± 10.3 <sup>a</sup> | 45.7 ± 9.06 <sup>a</sup> | 29.7 ± 2.74 <sup>b</sup> | 48.2 ± 2.42 <sup>a</sup>  | 54.8 ± 3.58 <sup>a</sup> |
| $\Sigma$ n-3 LC PUFA | 39.1 ± 11 <sup>a</sup>   | 61.7 ± 8.09 <sup>a</sup> | 54 ± 6.05 <sup>a</sup>   | 35.1 ± 6.31 <sup>a</sup> | 49.6 ± 8.68 <sup>a</sup> | 39.5 ± 7.83 <sup>a</sup> | 25.6 ± 2.23 <sup>b</sup> | 41.6 ± 2.16 <sup>a</sup>  | 48.1 ± 3.27 <sup>a</sup> |
| $\Sigma$ n-6 PUFA    | 61.5 ± 16.7 <sup>a</sup> | 77.7 ± 11 <sup>a</sup>   | 75.7 ± 10.6 <sup>a</sup> | 37.1 ± 5.73 <sup>a</sup> | 48.1 ± 4.37 <sup>a</sup> | 44.8 ± 7.47 <sup>a</sup> | 37.3 ± 3.21 <sup>b</sup> | 52.8 ± 2.86 <sup>a</sup>  | 60.4 ± 3.84 <sup>a</sup> |
| $\Sigma$ n-6 LC PUFA | 22.7 ± 3.83 <sup>a</sup> | 23.1 ± 0.61 <sup>a</sup> | 28.4 ± 4.33 <sup>a</sup> | 25.2 ± 5.5 <sup>a</sup>  | 29.8 ± 3.32 <sup>a</sup> | 20.4 ± 2.5 <sup>a</sup>  | 25.6 ± 2.54 <sup>b</sup> | 38.3 ± 2.75 <sup>a</sup>  | 36.8 ± 2.11 <sup>a</sup> |
| EPA:DHA              | 1.01 ± 0.16 <sup>a</sup> | 0.94 ± 0.17 <sup>a</sup> | 1.18 ± 0.36 <sup>a</sup> | 2.81 ± 0.66 <sup>a</sup> | 2.21 ± 0.3 <sup>ab</sup> | 1.36 ± 0.23 <sup>b</sup> | 2.38 ± 0.23 <sup>a</sup> | 2.4 ± 0.1 <sup>a</sup>    | 2.57 ± 0.11 <sup>a</sup> |
| EPA:ARA              | 1.19 ± 0.2 <sup>a</sup>  | 1.83 ± 0.18 <sup>a</sup> | 1.76 ± 0.43 <sup>a</sup> | 1.28 ± 0.19 <sup>a</sup> | 1.51 ± 0.23 <sup>a</sup> | 1.83 ± 0.28 <sup>a</sup> | 0.79 ± 0.04 <sup>b</sup> | 0.86 ± 0.06 <sup>ab</sup> | 0.98 ± 0.05 <sup>a</sup> |
| n-3:n-6              | 0.71 ± 0.02 <sup>b</sup> | 0.93 ± 0.09 <sup>a</sup> | 0.82 ± 0.02 <sup>a</sup> | 1.12 ± 0.16 <sup>a</sup> | 1.17 ± 0.12 <sup>a</sup> | 1.01 ± 0.03 <sup>a</sup> | 0.81 ± 0.04 <sup>a</sup> | 0.94 ± 0.06 <sup>a</sup>  | 0.93 ± 0.07 <sup>a</sup> |

Supplementary Table S6. Comparison of fatty acid composition (mg g lipid<sup>-1</sup>) of sample types between locations. Values are presented as means ± SEM. Values in the same row and group (i.e. sample type) that do not share the same superscripts are significantly different ( $p < 0.05$ ).

| Fatty acid  | HH                       |                           |                          | HD                        |                           |                           | DD                       |                           |                          |
|-------------|--------------------------|---------------------------|--------------------------|---------------------------|---------------------------|---------------------------|--------------------------|---------------------------|--------------------------|
|             | GBR                      | Palmyra                   | WA                       | GBR                       | Palmyra                   | WA                        | GBR                      | Palmyra                   | WA                       |
| <b>6:0</b>  | 0.13 ± 0.03 <sup>a</sup> | 0.09 ± 0.05 <sup>a</sup>  | 0.02 ± 0.02 <sup>a</sup> | 0.14 ± 0.05 <sup>a</sup>  | 0.16 ± 0.1 <sup>a</sup>   | 0.06 ± 0.04 <sup>a</sup>  | 0.39 ± 0.12 <sup>a</sup> | 0.13 ± 0.13 <sup>a</sup>  | 0.15 ± 0.07 <sup>a</sup> |
| <b>8:0</b>  |                          |                           |                          | 0 ± 0 <sup>b</sup>        | 0 ± 0 <sup>b</sup>        | 0.03 ± 0.02 <sup>a</sup>  | 0 ± 0 <sup>a</sup>       | 0 ± 0 <sup>a</sup>        | 0.01 ± 0.01 <sup>a</sup> |
| <b>10:0</b> | 2.14 ± 0.94 <sup>a</sup> | 0.03 ± 0.02 <sup>a</sup>  | 0.14 ± 0.04 <sup>a</sup> | 0.06 ± 0.03 <sup>b</sup>  | 0.02 ± 0.02 <sup>b</sup>  | 0.27 ± 0.12 <sup>a</sup>  | 0.01 ± 0.01 <sup>b</sup> | 0 ± 0 <sup>b</sup>        | 0.07 ± 0.03 <sup>a</sup> |
| <b>11:0</b> | 0.02 ± 0.02 <sup>a</sup> | 0.01 ± 0.01 <sup>a</sup>  | 0.04 ± 0.02 <sup>a</sup> | 0 ± 0 <sup>a</sup>        | 0.02 ± 0.02 <sup>a</sup>  | 0 ± 0 <sup>a</sup>        | 0 ± 0 <sup>a</sup>       | 0 ± 0 <sup>a</sup>        | 0.01 ± 0.01 <sup>a</sup> |
| <b>12:0</b> | 1.04 ± 0.13 <sup>a</sup> | 0.32 ± 0.04 <sup>b</sup>  | 0.77 ± 0.16 <sup>a</sup> | 0.88 ± 0.12 <sup>a</sup>  | 0.48 ± 0.05 <sup>b</sup>  | 0.55 ± 0.03 <sup>ab</sup> | 1.05 ± 0.26 <sup>a</sup> | 0.34 ± 0.2 <sup>a</sup>   | 0.56 ± 0.16 <sup>a</sup> |
| <b>13:0</b> | 0.26 ± 0.07 <sup>a</sup> | 0.26 ± 0.11 <sup>a</sup>  | 0.16 ± 0.09 <sup>a</sup> | 0.25 ± 0.03 <sup>ab</sup> | 0.32 ± 0.07 <sup>a</sup>  | 0.16 ± 0.03 <sup>b</sup>  | 0.08 ± 0.04 <sup>a</sup> | 0.13 ± 0.07 <sup>a</sup>  | 0.21 ± 0.05 <sup>a</sup> |
| <b>14:0</b> | 12.8 ± 2.15 <sup>a</sup> | 18.6 ± 5.14 <sup>a</sup>  | 16.6 ± 4.28 <sup>a</sup> | 8.88 ± 0.87 <sup>b</sup>  | 14.7 ± 2.39 <sup>a</sup>  | 19.9 ± 2.18 <sup>a</sup>  | 7.39 ± 0.72 <sup>a</sup> | 10.1 ± 3.86 <sup>a</sup>  | 14 ± 3.95 <sup>a</sup>   |
| <b>15:0</b> | 0.39 ± 0.04 <sup>a</sup> | 0.35 ± 0.17 <sup>ab</sup> | 0.15 ± 0.03 <sup>b</sup> | 0.4 ± 0.05 <sup>a</sup>   | 0.31 ± 0.05 <sup>a</sup>  | 0.22 ± 0.01 <sup>a</sup>  | 0.64 ± 0.09 <sup>a</sup> | 0.25 ± 0.11 <sup>b</sup>  | 0.34 ± 0.1 <sup>ab</sup> |
| <b>16:0</b> | 121 ± 15.6 <sup>a</sup>  | 165 ± 44.1 <sup>a</sup>   | 201 ± 53 <sup>a</sup>    | 82.1 ± 9.97 <sup>b</sup>  | 114 ± 19.9 <sup>ab</sup>  | 221 ± 45 <sup>a</sup>     | 76.2 ± 7.47 <sup>a</sup> | 97.7 ± 26.3 <sup>a</sup>  | 160 ± 53.4 <sup>a</sup>  |
| <b>17:0</b> | 0.44 ± 0.13 <sup>a</sup> | 0.44 ± 0.23 <sup>a</sup>  | 0.46 ± 0.16 <sup>a</sup> | 0.56 ± 0.12 <sup>a</sup>  | 0.31 ± 0.09 <sup>a</sup>  | 0.52 ± 0.14 <sup>a</sup>  | 1.68 ± 0.31 <sup>a</sup> | 1.83 ± 1.03 <sup>ab</sup> | 0.28 ± 0.14 <sup>b</sup> |
| <b>18:0</b> | 27.9 ± 1.23 <sup>a</sup> | 30.3 ± 5.89 <sup>a</sup>  | 22.3 ± 3.31 <sup>a</sup> | 28.2 ± 1.5 <sup>a</sup>   | 25.7 ± 3.42 <sup>a</sup>  | 23.6 ± 3.88 <sup>a</sup>  | 25.3 ± 3.71 <sup>a</sup> | 32.3 ± 9.23 <sup>a</sup>  | 17.7 ± 3.61 <sup>a</sup> |
| <b>20:0</b> | 3.82 ± 0.19 <sup>a</sup> | 4.36 ± 0.94 <sup>a</sup>  | 3.2 ± 0.42 <sup>a</sup>  | 3.66 ± 0.2 <sup>a</sup>   | 3.54 ± 0.48 <sup>a</sup>  | 3.7 ± 0.22 <sup>a</sup>   | 3.91 ± 0.33 <sup>a</sup> | 3.62 ± 0.88 <sup>a</sup>  | 3.12 ± 0.68 <sup>a</sup> |
| <b>21:0</b> | 0.39 ± 0.05 <sup>a</sup> | 0.27 ± 0.06 <sup>ab</sup> | 0.18 ± 0.05 <sup>b</sup> | 0.54 ± 0.06 <sup>a</sup>  | 0.37 ± 0.04 <sup>ab</sup> | 0.22 ± 0.06 <sup>b</sup>  | 0.99 ± 0.17 <sup>a</sup> | 1.16 ± 0.63 <sup>a</sup>  | 0.48 ± 0.22 <sup>a</sup> |
| <b>22:0</b> | 2.34 ± 0.43 <sup>a</sup> | 1.38 ± 0.52 <sup>a</sup>  | 1.16 ± 0.34 <sup>a</sup> | 2.8 ± 0.34 <sup>a</sup>   | 1.95 ± 0.15 <sup>ab</sup> | 1.25 ± 0.46 <sup>b</sup>  | 5.69 ± 1.11 <sup>a</sup> | 7.39 ± 4 <sup>a</sup>     | 1.45 ± 0.33 <sup>b</sup> |
| <b>24:0</b> | 0.88 ± 0.16 <sup>a</sup> | 0.56 ± 0.26 <sup>a</sup>  | 0.37 ± 0.11 <sup>a</sup> | 1.25 ± 0.2 <sup>a</sup>   | 0.72 ± 0.12 <sup>ab</sup> | 0.43 ± 0.11 <sup>b</sup>  | 2.81 ± 0.66 <sup>a</sup> | 3.26 ± 1.66 <sup>a</sup>  | 0.64 ± 0.13 <sup>b</sup> |

|                 |                           |                           |                           |                          |                           |                          |                           |                           |                          |
|-----------------|---------------------------|---------------------------|---------------------------|--------------------------|---------------------------|--------------------------|---------------------------|---------------------------|--------------------------|
| <b>14:1n-5</b>  | 1.43 ± 0.33 <sup>a</sup>  | 0.26 ± 0.09 <sup>b</sup>  | 0.41 ± 0.36 <sup>b</sup>  | 1.77 ± 0.34 <sup>a</sup> | 0.83 ± 0.24 <sup>a</sup>  | 0.66 ± 0.29 <sup>a</sup> | 1.64 ± 0.6 <sup>a</sup>   | 0.4 ± 0.27 <sup>a</sup>   | 0.4 ± 0.19 <sup>a</sup>  |
| <b>15:1n-5</b>  | 1.05 ± 0.25 <sup>a</sup>  | 0.32 ± 0.15 <sup>a</sup>  | 0.67 ± 0.1 <sup>a</sup>   | 1.08 ± 0.23 <sup>a</sup> | 0.56 ± 0.07 <sup>a</sup>  | 0.68 ± 0.14 <sup>a</sup> | 1 ± 0.35 <sup>a</sup>     | 0.18 ± 0.11 <sup>a</sup>  | 0.48 ± 0.12 <sup>a</sup> |
| <b>16:1n-7</b>  | 5.78 ± 1.32 <sup>a</sup>  | 6.29 ± 1.56 <sup>a</sup>  | 16.6 ± 5.8 <sup>a</sup>   | 3.3 ± 0.28 <sup>b</sup>  | 4.65 ± 0.61 <sup>a</sup>  | 19.3 ± 6.86 <sup>a</sup> | 3.05 ± 0.25 <sup>b</sup>  | 2.82 ± 1.08 <sup>b</sup>  | 14.6 ± 6.47 <sup>a</sup> |
| <b>17:1n-7</b>  | 17.9 ± 5.19 <sup>a</sup>  | 19.4 ± 8.83 <sup>a</sup>  | 3.99 ± 3.99 <sup>a</sup>  | 11.6 ± 1.9 <sup>a</sup>  | 17.6 ± 4.67 <sup>a</sup>  | 10.9 ± 10.9 <sup>a</sup> | 8.62 ± 0.94 <sup>ab</sup> | 6.88 ± 5.2 <sup>b</sup>   | 23 ± 6.88 <sup>a</sup>   |
| <b>18:1n-7</b>  | 0.61 ± 0.08 <sup>a</sup>  | 2.41 ± 1.38 <sup>a</sup>  | 0.98 ± 0.29 <sup>a</sup>  | 2.07 ± 1.48 <sup>a</sup> | 0.46 ± 0.06 <sup>a</sup>  | 1.09 ± 0.31 <sup>a</sup> | 1.4 ± 0.27 <sup>a</sup>   | 0.32 ± 0.11 <sup>b</sup>  | 1.25 ± 0.3 <sup>a</sup>  |
| <b>18:1n-7t</b> | 0.1 ± 0.06 <sup>b</sup>   | 0.19 ± 0.12 <sup>ab</sup> | 0.5 ± 0.2 <sup>a</sup>    | 0.05 ± 0.05 <sup>a</sup> | 0.07 ± 0.04 <sup>a</sup>  | 0.04 ± 0.04 <sup>a</sup> | 0.01 ± 0.01 <sup>a</sup>  | 0 ± 0 <sup>a</sup>        | 0.03 ± 0.02 <sup>a</sup> |
| <b>18:1n-9</b>  | 14.4 ± 2.71 <sup>a</sup>  | 13.8 ± 2.38 <sup>a</sup>  | 31.3 ± 10.2 <sup>a</sup>  | 13 ± 5.89 <sup>b</sup>   | 6.89 ± 1.13 <sup>b</sup>  | 31 ± 10.5 <sup>a</sup>   | 7.71 ± 0.55 <sup>a</sup>  | 6.82 ± 1.31 <sup>a</sup>  | 23.6 ± 9.22 <sup>a</sup> |
| <b>18:1n-9t</b> | 0.22 ± 0.13 <sup>a</sup>  | 1.43 ± 1.16 <sup>a</sup>  | 0.51 ± 0.24 <sup>a</sup>  | 4.57 ± 2.98 <sup>a</sup> | 0.11 ± 0.09 <sup>a</sup>  | 0.24 ± 0.11 <sup>a</sup> | 0.11 ± 0.11 <sup>a</sup>  | 0 ± 0 <sup>a</sup>        | 0.01 ± 0.01 <sup>a</sup> |
| <b>20:1n-9</b>  | 5.57 ± 0.59 <sup>ab</sup> | 4.48 ± 1.45 <sup>b</sup>  | 9.8 ± 2.13 <sup>a</sup>   | 3.82 ± 0.4 <sup>a</sup>  | 3.05 ± 0.61 <sup>a</sup>  | 5.45 ± 3.63 <sup>a</sup> | 2.93 ± 0.27 <sup>ab</sup> | 2.12 ± 0.43 <sup>b</sup>  | 7.81 ± 2.51 <sup>a</sup> |
| <b>22:1n-9</b>  | 0.96 ± 0.34 <sup>a</sup>  | 1.43 ± 0.66 <sup>a</sup>  | 0.72 ± 0.22 <sup>a</sup>  | 1.2 ± 0.28 <sup>a</sup>  | 1.53 ± 0.33 <sup>a</sup>  | 0.38 ± 0.03 <sup>b</sup> | 2.56 ± 0.62 <sup>a</sup>  | 4.37 ± 1.99 <sup>a</sup>  | 0.52 ± 0.11 <sup>b</sup> |
| <b>24:1n-9</b>  | 0.07 ± 0.03 <sup>a</sup>  | 0.05 ± 0.04 <sup>a</sup>  | 0.11 ± 0.05 <sup>a</sup>  | 0.01 ± 0.01 <sup>b</sup> | 0.08 ± 0.06 <sup>ab</sup> | 0.07 ± 0.02 <sup>a</sup> | 0.04 ± 0.03 <sup>b</sup>  | 0 ± 0 <sup>b</sup>        | 0.18 ± 0.12 <sup>a</sup> |
| <b>20:1n-11</b> | 0 ± 0 <sup>b</sup>        | 0 ± 0 <sup>b</sup>        | 0.64 ± 0.22 <sup>a</sup>  | 0 ± 0 <sup>b</sup>       | 0 ± 0 <sup>b</sup>        | 0.48 ± 0.27 <sup>a</sup> | 0 ± 0 <sup>b</sup>        | 0 ± 0 <sup>b</sup>        | 0.46 ± 0.25 <sup>a</sup> |
| <b>22:1n-11</b> | 0.13 ± 0.02 <sup>a</sup>  | 0.09 ± 0.03 <sup>a</sup>  | 0.15 ± 0.03 <sup>a</sup>  | 0.24 ± 0.14 <sup>a</sup> | 0.12 ± 0.06 <sup>a</sup>  | 0.15 ± 0.04 <sup>a</sup> | 0.28 ± 0.1 <sup>a</sup>   | 0.13 ± 0.09 <sup>a</sup>  | 0.23 ± 0.07 <sup>a</sup> |
| <b>18:3n-3</b>  | 0.1 ± 0.03 <sup>a</sup>   | 0.06 ± 0.04 <sup>a</sup>  | 0.13 ± 0.02 <sup>a</sup>  | 0.16 ± 0.09 <sup>a</sup> | 0.02 ± 0.02 <sup>a</sup>  | 0.15 ± 0.04 <sup>a</sup> | 0.31 ± 0.12 <sup>a</sup>  | 0.02 ± 0.02 <sup>ab</sup> | 0.21 ± 0.05 <sup>a</sup> |
| <b>18:4n-3</b>  | 6.66 ± 0.61 <sup>a</sup>  | 6.14 ± 1.27 <sup>a</sup>  | 7.84 ± 1.34 <sup>a</sup>  | 6.43 ± 0.7 <sup>a</sup>  | 7.99 ± 1.67 <sup>a</sup>  | 9.04 ± 0.84 <sup>a</sup> | 3.8 ± 0.46 <sup>a</sup>   | 4.71 ± 0.37 <sup>a</sup>  | 5.14 ± 1.83 <sup>a</sup> |
| <b>20:4n-3</b>  | 0.42 ± 0.1 <sup>a</sup>   | 0.43 ± 0.25 <sup>a</sup>  | 0.46 ± 0.23 <sup>a</sup>  | 0.22 ± 0.08 <sup>b</sup> | 0.12 ± 0.12 <sup>b</sup>  | 0.7 ± 0.16 <sup>a</sup>  | 0.08 ± 0.05 <sup>b</sup>  | 0 ± 0 <sup>b</sup>        | 0.44 ± 0.17 <sup>a</sup> |
| <b>20:5n-3</b>  | 26 ± 1.32 <sup>a</sup>    | 19.1 ± 3.8 <sup>a</sup>   | 23.8 ± 0.68 <sup>a</sup>  | 22.7 ± 1.24 <sup>a</sup> | 29 ± 5.85 <sup>a</sup>    | 24.2 ± 2.73 <sup>a</sup> | 13.9 ± 1.28 <sup>a</sup>  | 18.6 ± 3.17 <sup>a</sup>  | 15.8 ± 3.82 <sup>a</sup> |
| <b>22:3n-3</b>  | 3.99 ± 2.04 <sup>a</sup>  | 0 ± 0 <sup>a</sup>        | 0 ± 0 <sup>a</sup>        | 2.74 ± 1.86 <sup>a</sup> | 0 ± 0 <sup>a</sup>        | 3.29 ± 3.29 <sup>a</sup> |                           |                           |                          |
| <b>22:5n-3</b>  | 7.36 ± 0.57 <sup>a</sup>  | 4.82 ± 0.69 <sup>b</sup>  | 5.77 ± 0.61 <sup>ab</sup> | 6.46 ± 0.6 <sup>a</sup>  | 7.08 ± 1.24 <sup>a</sup>  | 5.88 ± 0.22 <sup>a</sup> | 5.33 ± 0.65 <sup>a</sup>  | 8.73 ± 3.38 <sup>a</sup>  | 4.24 ± 0.96 <sup>a</sup> |
| <b>22:6n-3</b>  | 10.3 ± 0.68 <sup>b</sup>  | 15.1 ± 3.56 <sup>ab</sup> | 23.8 ± 5.87 <sup>a</sup>  | 9.55 ± 0.56 <sup>b</sup> | 13.4 ± 2.28 <sup>ab</sup> | 27.5 ± 4.93 <sup>a</sup> | 6.18 ± 0.69 <sup>a</sup>  | 7.83 ± 2.06 <sup>a</sup>  | 18.5 ± 6.26 <sup>a</sup> |
| <b>24:5n-3</b>  | 0.03 ± 0.03 <sup>a</sup>  | 0.03 ± 0.02 <sup>a</sup>  | 0.01 ± 0.01 <sup>a</sup>  | 0 ± 0 <sup>b</sup>       | 0.02 ± 0.02 <sup>ab</sup> | 0.1 ± 0.08 <sup>a</sup>  |                           |                           |                          |
| <b>24:6n-3</b>  | 0.02 ± 0.01 <sup>b</sup>  | 0.09 ± 0.03 <sup>a</sup>  | 0.09 ± 0.02 <sup>a</sup>  | 0 ± 0 <sup>c</sup>       | 0.05 ± 0.03 <sup>b</sup>  | 0.11 ± 0 <sup>a</sup>    | 0.03 ± 0.03 <sup>a</sup>  | 0 ± 0 <sup>a</sup>        | 0.05 ± 0.04 <sup>a</sup> |
| <b>16:2n-4</b>  | 0.57 ± 0.37 <sup>a</sup>  | 0.27 ± 0.27 <sup>a</sup>  | 1.26 ± 0.63 <sup>a</sup>  | 1.39 ± 0.49 <sup>a</sup> | 0.56 ± 0.56 <sup>a</sup>  | 0.03 ± 0.03 <sup>a</sup> | 1.78 ± 0.18 <sup>a</sup>  | 1.92 ± 0.57 <sup>a</sup>  | 1.19 ± 0.4 <sup>a</sup>  |
| <b>16:3n-4</b>  | 1.23 ± 0.65 <sup>a</sup>  | 1.81 ± 0.84 <sup>a</sup>  | 2.73 ± 1.24 <sup>a</sup>  | 0.18 ± 0.12 <sup>b</sup> | 0.73 ± 0.42 <sup>b</sup>  | 3.14 ± 0.72 <sup>a</sup> | 0.04 ± 0.04 <sup>b</sup>  | 0 ± 0 <sup>b</sup>        | 1.17 ± 0.73 <sup>a</sup> |
| <b>18:2n-6</b>  | 3.68 ± 0.48 <sup>b</sup>  | 3.91 ± 1.07 <sup>ab</sup> | 7.78 ± 1.75 <sup>a</sup>  | 2.69 ± 0.24 <sup>b</sup> | 2.63 ± 0.41 <sup>b</sup>  | 9.42 ± 1.51 <sup>a</sup> | 2.64 ± 0.22 <sup>a</sup>  | 2.63 ± 0.58 <sup>a</sup>  | 7.17 ± 2.28 <sup>a</sup> |
| <b>18:2n-6t</b> | 0.06 ± 0.05 <sup>a</sup>  | 0.04 ± 0.02 <sup>a</sup>  | 0.05 ± 0.01 <sup>a</sup>  | 0 ± 0 <sup>b</sup>       | 0 ± 0 <sup>b</sup>        | 0.01 ± 0.01 <sup>a</sup> | 0.08 ± 0.06 <sup>b</sup>  | 0 ± 0 <sup>b</sup>        | 0.35 ± 0.07 <sup>a</sup> |
| <b>18:3n-6</b>  | 18.7 ± 3.05 <sup>a</sup>  | 19.3 ± 5.71 <sup>a</sup>  | 37.7 ± 12.2 <sup>a</sup>  | 10.5 ± 0.75 <sup>b</sup> | 14.4 ± 2.6 <sup>ab</sup>  | 43.3 ± 9.99 <sup>a</sup> | 7.94 ± 0.89 <sup>a</sup>  | 8.44 ± 3.03 <sup>a</sup>  | 29.6 ± 11.5 <sup>a</sup> |
| <b>20:2n-6</b>  | 1.18 ± 0.08 <sup>b</sup>  | 1.18 ± 0.19 <sup>b</sup>  | 1.74 ± 0.18 <sup>a</sup>  | 1.32 ± 0.09 <sup>b</sup> | 1.22 ± 0.17 <sup>b</sup>  | 1.85 ± 0.13 <sup>a</sup> | 1.01 ± 0.09 <sup>a</sup>  | 0.89 ± 0.14 <sup>a</sup>  | 1.71 ± 0.37 <sup>a</sup> |
| <b>20:3n-6</b>  | 1.76 ± 0.32 <sup>a</sup>  | 2.67 ± 1 <sup>a</sup>     | 4.48 ± 1.23 <sup>a</sup>  | 0.89 ± 0.19 <sup>b</sup> | 1.22 ± 0.53 <sup>b</sup>  | 5.2 ± 1.19 <sup>a</sup>  | 0.31 ± 0.17 <sup>b</sup>  | 1.21 ± 0.7 <sup>b</sup>   | 3.71 ± 1.13 <sup>a</sup> |
| <b>20:4n-6</b>  | 26.7 ± 1.07 <sup>a</sup>  | 10.8 ± 1.79 <sup>b</sup>  | 15.1 ± 3.24 <sup>b</sup>  | 27.2 ± 1.75 <sup>a</sup> | 19.2 ± 2.37 <sup>b</sup>  | 13.5 ± 2.07 <sup>b</sup> | 18 ± 1.75 <sup>a</sup>    | 16.1 ± 3.85 <sup>a</sup>  | 12.8 ± 1.9 <sup>a</sup>  |

|                     |                           |                          |                          |                          |                           |                          |                           |                          |                          |
|---------------------|---------------------------|--------------------------|--------------------------|--------------------------|---------------------------|--------------------------|---------------------------|--------------------------|--------------------------|
| <b>22:2n-6</b>      | 0.01 ± 0.01 <sup>b</sup>  | 0.05 ± 0.03 <sup>a</sup> | 0.03 ± 0 <sup>a</sup>    | 0.02 ± 0.02 <sup>a</sup> | 0 ± 0 <sup>a</sup>        | 0.04 ± 0.02 <sup>a</sup> | 0.05 ± 0.04 <sup>a</sup>  | 0 ± 0 <sup>a</sup>       | 0.03 ± 0.03 <sup>a</sup> |
| <b>22:4n-6</b>      | 8.24 ± 1.88 <sup>a</sup>  | 6.86 ± 1.37 <sup>a</sup> | 8.75 ± 2.17 <sup>a</sup> | 10.2 ± 1.63 <sup>a</sup> | 9.4 ± 1.23 <sup>ab</sup>  | 4.42 ± 2.31 <sup>b</sup> | 7.28 ± 0.92 <sup>a</sup>  | 7.89 ± 1.68 <sup>a</sup> | 6.06 ± 1.01 <sup>a</sup> |
| <b>22:5n-6</b>      | 0.03 ± 0.02 <sup>a</sup>  | 0 ± 0 <sup>a</sup>       | 0.02 ± 0.02 <sup>a</sup> |                          |                           |                          | 0.02 ± 0.02 <sup>b</sup>  | 0 ± 0 <sup>b</sup>       | 0.14 ± 0.14 <sup>a</sup> |
| <b>Total</b>        | 339 ± 29.2 <sup>a</sup>   | 364 ± 71.2 <sup>a</sup>  | 454 ± 91.2 <sup>a</sup>  | 275 ± 18.4 <sup>b</sup>  | 306 ± 40.1 <sup>ab</sup>  | 495 ± 81.4 <sup>a</sup>  | 224 ± 19.8 <sup>a</sup>   | 261 ± 49.9 <sup>a</sup>  | 380 ± 115 <sup>a</sup>   |
| <b>ΣSFA</b>         | 174 ± 19.5 <sup>a</sup>   | 222 ± 55.4 <sup>a</sup>  | 246 ± 57.2 <sup>a</sup>  | 130 ± 11.9 <sup>b</sup>  | 163 ± 25.4 <sup>ab</sup>  | 272 ± 43.1 <sup>a</sup>  | 126 ± 13.6 <sup>a</sup>   | 158 ± 36 <sup>a</sup>    | 199 ± 60.2 <sup>a</sup>  |
| <b>ΣMUFA</b>        | 48.2 ± 6.19 <sup>a</sup>  | 50.2 ± 4.82 <sup>a</sup> | 66.4 ± 14.9 <sup>a</sup> | 42.7 ± 10.6 <sup>a</sup> | 35.9 ± 7 <sup>a</sup>     | 70.5 ± 23.6 <sup>a</sup> | 29.3 ± 2.37 <sup>a</sup>  | 24 ± 6.94 <sup>a</sup>   | 72.6 ± 25.3 <sup>a</sup> |
| <b>ΣPUFA</b>        | 117 ± 6.42 <sup>ab</sup>  | 92.7 ± 17.2 <sup>b</sup> | 142 ± 19.7 <sup>a</sup>  | 103 ± 3.92 <sup>b</sup>  | 107 ± 14.3 <sup>ab</sup>  | 152 ± 18 <sup>a</sup>    | 68.8 ± 5.82 <sup>a</sup>  | 78.9 ± 11.3 <sup>a</sup> | 108 ± 30.3 <sup>a</sup>  |
| <b>ΣTRANS</b>       | 0.38 ± 0.18 <sup>a</sup>  | 1.66 ± 1.13 <sup>a</sup> | 1.06 ± 0.43 <sup>a</sup> | 4.61 ± 2.98 <sup>a</sup> | 0.18 ± 0.12 <sup>a</sup>  | 0.29 ± 0.09 <sup>a</sup> | 0.2 ± 0.11 <sup>b</sup>   | 0 ± 0 <sup>b</sup>       | 0.39 ± 0.05 <sup>a</sup> |
| <b>Σn-3 PUFA</b>    | 54.8 ± 3.58 <sup>a</sup>  | 45.7 ± 9.06 <sup>a</sup> | 61.9 ± 7.4 <sup>a</sup>  | 48.2 ± 2.42 <sup>b</sup> | 57.6 ± 10.3 <sup>ab</sup> | 70.9 ± 8.06 <sup>a</sup> | 29.7 ± 2.74 <sup>a</sup>  | 39.9 ± 6.65 <sup>a</sup> | 44.4 ± 12.7 <sup>a</sup> |
| <b>Σn-3 LC PUFA</b> | 48.1 ± 3.27 <sup>a</sup>  | 39.5 ± 7.83 <sup>a</sup> | 54 ± 6.05 <sup>a</sup>   | 41.6 ± 2.16 <sup>b</sup> | 49.6 ± 8.68 <sup>ab</sup> | 61.7 ± 8.09 <sup>a</sup> | 25.6 ± 2.23 <sup>a</sup>  | 35.1 ± 6.31 <sup>a</sup> | 39.1 ± 11 <sup>a</sup>   |
| <b>Σn-6 PUFA</b>    | 60.4 ± 3.84 <sup>ab</sup> | 44.8 ± 7.47 <sup>b</sup> | 75.7 ± 10.6 <sup>a</sup> | 52.8 ± 2.86 <sup>b</sup> | 48.1 ± 4.37 <sup>b</sup>  | 77.7 ± 11 <sup>a</sup>   | 37.3 ± 3.21 <sup>a</sup>  | 37.1 ± 5.73 <sup>a</sup> | 61.5 ± 16.7 <sup>a</sup> |
| <b>Σn-6 LC PUFA</b> | 36.8 ± 2.11 <sup>a</sup>  | 20.4 ± 2.5 <sup>b</sup>  | 28.4 ± 4.33 <sup>b</sup> | 38.3 ± 2.75 <sup>a</sup> | 29.8 ± 3.32 <sup>ab</sup> | 23.1 ± 0.61 <sup>b</sup> | 25.6 ± 2.54 <sup>a</sup>  | 25.2 ± 5.5 <sup>a</sup>  | 22.7 ± 3.83 <sup>a</sup> |
| <b>EPA:DHA</b>      | 2.57 ± 0.11 <sup>a</sup>  | 1.36 ± 0.23 <sup>b</sup> | 1.18 ± 0.36 <sup>b</sup> | 2.4 ± 0.1 <sup>a</sup>   | 2.21 ± 0.3 <sup>a</sup>   | 0.94 ± 0.17 <sup>b</sup> | 2.38 ± 0.23 <sup>a</sup>  | 2.81 ± 0.66 <sup>a</sup> | 1.01 ± 0.16 <sup>b</sup> |
| <b>EPA:ARA</b>      | 0.98 ± 0.05 <sup>b</sup>  | 1.83 ± 0.28 <sup>a</sup> | 1.76 ± 0.43 <sup>a</sup> | 0.86 ± 0.06 <sup>b</sup> | 1.51 ± 0.23 <sup>a</sup>  | 1.83 ± 0.18 <sup>a</sup> | 0.79 ± 0.04 <sup>b</sup>  | 1.28 ± 0.19 <sup>a</sup> | 1.19 ± 0.2 <sup>a</sup>  |
| <b>n-3:n-6</b>      | 0.93 ± 0.07 <sup>a</sup>  | 1.01 ± 0.03 <sup>a</sup> | 0.82 ± 0.02 <sup>a</sup> | 0.94 ± 0.06 <sup>a</sup> | 1.17 ± 0.12 <sup>a</sup>  | 0.93 ± 0.09 <sup>a</sup> | 0.81 ± 0.04 <sup>ab</sup> | 1.12 ± 0.16 <sup>a</sup> | 0.71 ± 0.02 <sup>b</sup> |

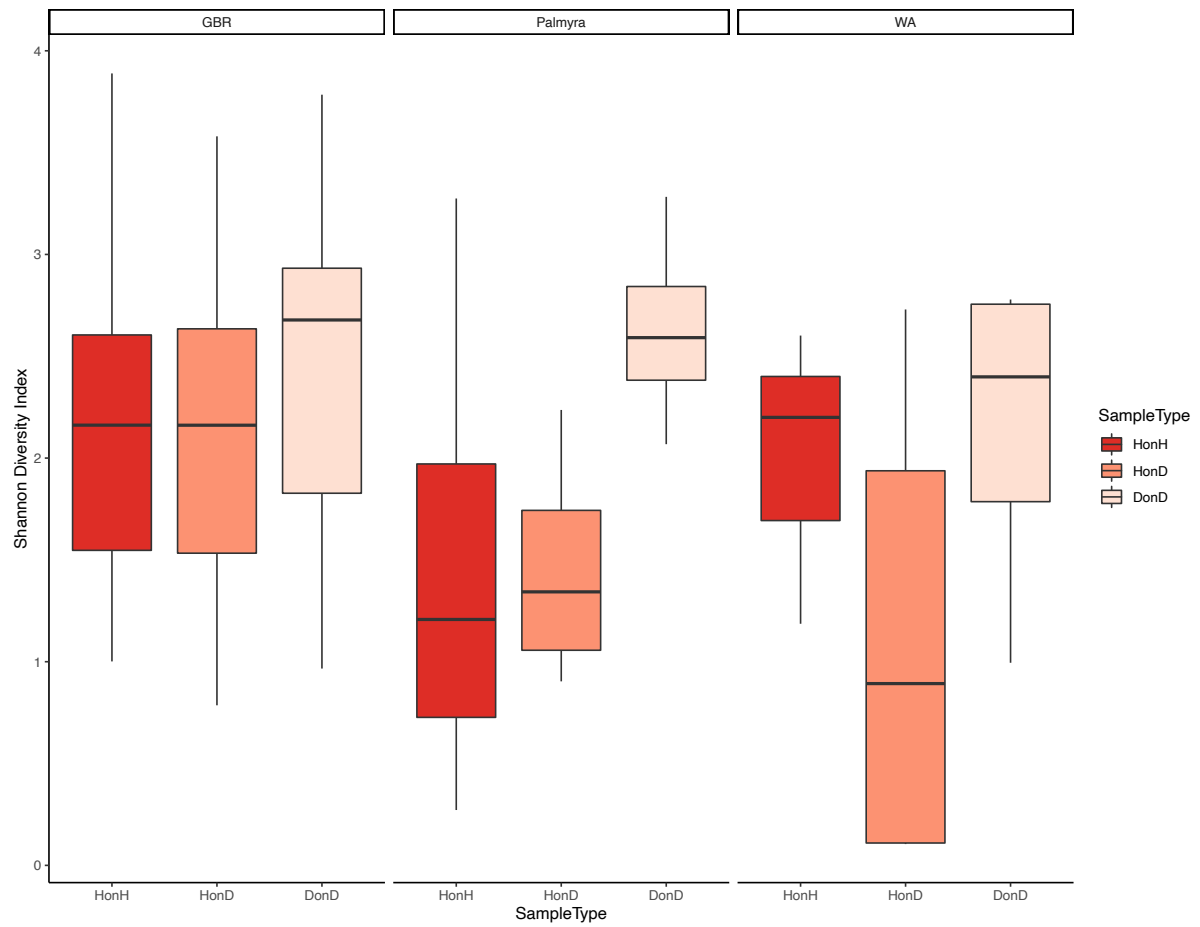

Supplementary Figure S3. Shannon diversity index for microbial communities associated with healthy and diseased colonies of *A. hyacinthus*.

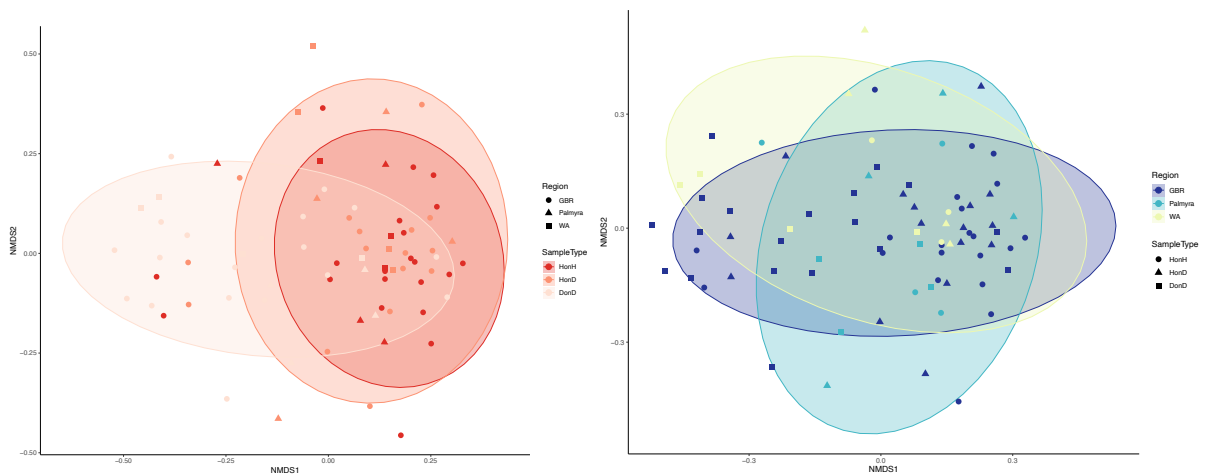

Supplementary Figure S4. nMDS of microbial community composition with ellipses representing 90% confidence intervals for A) health states and B) locations.

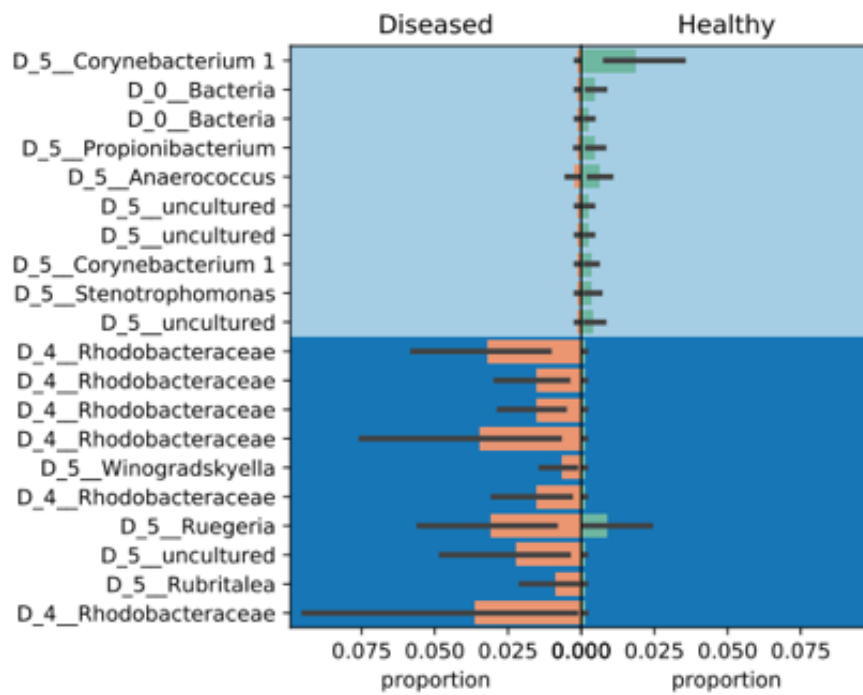

Supplementary Figure S5. Correlation clustering identified sequence variants with significantly different relative abundance in diseased and healthy tissue.
